1 **Cortical microtubule remodelling during strigolactone- and light-mediated**  
2 **growth inhibition of Arabidopsis hypocotyls**

3

4 Running title: Strigolactones and light regulate plant microtubules

5

6 Yuliya A. Krasylenko<sup>1,+</sup>, George Komis<sup>1,+</sup>, Sonya Hlynska<sup>1</sup>, Tereza Vavrdová<sup>1</sup>,  
7 Miroslav Ovečka<sup>1</sup>, Tomáš Pospíšil<sup>2</sup>, and Jozef Šamaj<sup>1,\*</sup>

8

9 <sup>1</sup>Department of Cell Biology, Centre of the Region Haná for Biotechnological and Agricultural  
10 Research, Faculty of Science, Palacký University, Šlechtitelů 27, 783 71 Olomouc, Czech  
11 Republic

12 <sup>2</sup>Department of Chemical Biology and Genetics, Centre of the Region Haná for Biotechnological  
13 and Agricultural Research, Faculty of Science, Palacký University, Šlechtitelů 27, 783 71  
14 Olomouc, Czech Republic

15

16 \*Correspondence: Jozef Šamaj, [jozef.samaj@upol.cz](mailto:jozef.samaj@upol.cz)

17 + contributed equally

18

19 **Word count**

20

21 Highlight: 24

22 Abstract: 200

23 Main text (Introduction (703), Results (3057), Discussion (1566)): 5326

24 Number of Figures: 9

25 Number of Supplementary Figures: 2

26 Number of Supplementary Movies: 8

27 Number of Supplementary Tables: 13

28 **Highlight**

29

30 Strigolactones regulate organization and dynamics of cortical microtubules in hypocotyl cells,  
31 which contributes to the light-mediated inhibition of hypocotyl growth in Arabidopsis seedlings.

32

33

34 **Abstract**

35

36 Strigolactones are phytohormones involved in shoot branching and hypocotyl elongation. The  
37 latter phenomenon was addressed herein by the exogenous application of a synthetic  
38 strigolactone GR24 and an inhibitor of strigolactone biosynthesis TIS108 on hypocotyls of wild  
39 type *Arabidopsis* and a strigolactone signalling mutant *max2-1* (*more axillary growth 2-1*).  
40 Owing to the interdependence between light and strigolactone signalling, the present work was  
41 extended to seedling cultivation under a standard light/dark regime, or under continuous  
42 darkness. Given the essential role of the cortical microtubules in cell elongation, their  
43 organization and dynamics were characterized under the conditions of altered strigolactone  
44 signalling using fluorescence microscopy methods with different spatiotemporal capacities such  
45 as confocal laser scanning microscopy and structured illumination microscopy. It was found that  
46 the strigolactone-dependent inhibition of hypocotyl elongation correlated with changes in  
47 cortical microtubule organization and dynamics, visualized in living wild type and *max2-1*  
48 seedlings stably expressing genetically-encoded fluorescent molecular markers for microtubules.  
49 Quantitative analysis of microscopic datasets revealed that chemical and/or genetic manipulation  
50 of strigolactone signalling affected microtubule remodelling, especially under light conditions.  
51 The application of GR24 and TIS108 in dark conditions partially alleviated cytoskeletal  
52 rearrangement, suggesting a new mechanistic connection between the cytoskeletal behaviour and  
53 the light-dependence of strigolactone signalling.

54

55 **Key words:** cortical microtubules, GR24, kymographs, *max2-1* mutant, light, microtubule  
56 organization, microtubule dynamics, strigolactone, structured illumination microscopy, TIS108

57

58

59 **Abbreviations:** BZR1 – BRASSINAZOLE-RESISTANT 1; CLSM – confocal laser scanning  
60 confocal microscopy; COP1 – CONSTITUTIVE PHOTOMORPHOGENIC 1; CRY1/2 –  
61 CRYPTOCHROMES 1 and 2; CUL – CULLIN; DDB1 – DAMAGE-BINDING PROTEIN 1;  
62 MAX2 – MORE AXILLARY GROWTH2; MBD – MT-binding domain of mammalian non-  
63 neuronal MICROTUBULE ASSOCIATED PROTEIN4; MDP40 – MICROTUBULE  
64 DESTABILIZING PROTEIN40; MS – Murashige and Skoog; MT – microtubules; PHYA/B –  
65 PHYTOCHROME A and B; RBX1 – RING-BOX1; SCF complex – SKP1-CULLIN-F-BOX  
66 complex; SIM – structured illumination microscopy; Skp1 – S-phase kinase-associated protein 1;  
67 SL – strigolactone(s); SMLX – SUPPRESSOR OF MORE AXILLARY GROWTH2-LIKE;  
68 TUA6 –  $\alpha$ -TUBULIN 6; WDL3 – WAVE-DAMPENED 2-LIKE 3.

69

70

## 71 **Introduction**

72 Strigolactones (SL), the carotenoid-derived plant hormones and rhizosphere signaling  
73 molecules, were discovered in exogenous allelochemical responses as germination stimulants of  
74 Orobanchaceae root parasitic weed (*Striga*, *Orobanche*, *Phelipanche*, and *Alectra* spp.) (Cook *et*  
75 *al.*, 1966; Gomez-Roldan *et al.*, 2008; Koltai, 2014). SL induce hyphal branching of arbuscular  
76 mycorrhizal fungi (Akiyama *et al.*, 2005), promote nodulation in the legume-rhizobium  
77 symbiosis (Soto *et al.*, 2009), and enhance plant resistance to drought, salt and osmotic stresses,  
78 and to low soil phosphate and nitrate content (Yoneyama *et al.*, 2007; Foo *et al.*, 2013; Ha *et al.*,  
79 2014). The physiological effects of SL on the aboveground plant part include the regression of  
80 plant height and hypocotyl length (Stirnberg *et al.*, 2002; de Saint Germain *et al.*, 2013),  
81 regulation of shoot branching by modulating auxin transport (Kapulnik *et al.*, 2011; Shinohara *et*  
82 *al.*, 2013), increased expansion of cotyledons in etiolated *Arabidopsis* seedlings (Stirnberg *et al.*,  
83 2002; Tsuchiya *et al.*, 2010), suppression of the preformed axillary bud outgrowths (Gomez-  
84 Roldan *et al.*, 2008; Umehara *et al.*, 2008; Domagalska and Leyser, 2011), rescue of the dark-  
85 induced elongation of rice mesocotyls (Hu *et al.*, 2010), promotion of the secondary growth and  
86 cell divisions in cambium, and stimulation of leaf senescence (Agusti *et al.*, 2011; Koren *et al.*,  
87 2013; Koltai, 2014). Furthermore, synthetic SL GR24 acts synergistically with auxins and it is  
88 used in potato tuber formation, the outgrowth of the axillary stolon buds, and above-ground  
89 shoot branching (Roumeliotis *et al.*, 2012). Not only parasitic plant seeds undergo enhanced  
90 maturation in SL presence, but also *Arabidopsis* seeds germinate faster (Tsuchiya *et al.*, 2010).

91 SL are perceived by the  $\alpha/\beta$ -hydrolase receptor DWARF14 (Seto *et al.*, 2019) via a  
92 specific receptor system, while subsequent signalling requires the SKP1-CULLIN-F-BOX (SCF)  
93 complex and proteasome-mediated degradation of target proteins (reviewed by Kumar *et al.*,  
94 2015a; Yoneyama *et al.*, 2020). At physiological and molecular levels, SL have been suggested  
95 to affect auxin efflux (Koltai, 2014) through PIN1 efflux carrier in the root (Ruyter-Spira *et al.*,  
96 2011) but also to dampen auxin transport in the shoot (Domagalska and Leyser, 2011).

97 Plant cytoskeleton is involved in many processes regulated by SL, e.g. the switch from  
98 the cell division to expansion (Ruan and Wasteneys, 2014), the cell elongation and  
99 differentiation (Ivakov and Persson, 2013; Ambrose and Wasteneys, 2014; Sampathkumar *et al.*,  
100 2014), as well as in plant responses to salt (Shoji *et al.*, 2006) and osmotic stresses (Komis *et al.*,  
101 2002; Wang *et al.*, 2010).

102 It is presumed that SL, as a new class of phytohormones, indirectly regulate cytoskeleton  
103 organization together with well-studied phytohormones such as auxins, cytokinins, gibberellins  
104 and abscisic acid. Through the indirect regulation of microtubules (MT) and actin filaments, SL  
105 should orchestrate morphogenesis of both above- and underground plant parts (Blume *et al.*,  
106 2017). Previously, it was reported that SL affect architecture and dynamics of actin filaments in  
107 *Arabidopsis* root cells (Pandya-Kumar *et al.*, 2014). GR24 reduces F-actin filament bundling in a  
108 MORE AXILLARY GROWTH2 (MAX2)-dependent manner and, at the same time, enhances  
109 actin dynamics, affects endosome trafficking and PIN2 localization in the plasma membrane  
110 (Pandya-Kumar *et al.*, 2014). Moreover, plant response to low phosphorus conditions involves  
111 MAX2-dependent reduction of PIN2 and endosome trafficking, plasma membrane polarization,  
112 and increased actin filament bundling in epidermal root cells (Kumar *et al.*, 2015b). Concerning  
113 MT, the other fundamental cytoskeletal component, SL analogues MEB55 and ST362 were  
114 found to compromise the integrity of the MT network in animal cells (Mayzlish-Gati *et al.*,  
115 2015). Moreover, SL analogues also affect the MT regulation by activating apoptotic p38  
116 (mitogen-activated protein kinase) cascade and inhibiting cyclin B expression (Pollock *et al.*,  
117 2014).

118 However, there are no reports on the effects of SL on plant MT so far. This study shows  
119 effects of exogenously applied synthetic SL GR24 and inhibitor of SL biosynthesis TIS108 on  
120 the organization and dynamics of cortical MT in epidermal cells of light-exposed and etiolated  
121 hypocotyls of wild type plants and SL-insensitive *Arabidopsis* mutant *max2-1*. Our results  
122 suggest that strigolactones affect mainly MT cytoskeleton under light conditions and this effect  
123 can be alleviated by darkness. From the methodological point of view, we have used  
124 combination of confocal laser scanning confocal microscopy (CLSM) and super-resolution  
125 structured illumination microscopy (SIM) to obtain these results.

126

## 127 **Materials and methods**

128

### 129 *Plant material and growth conditions*

130 Wild-type *Arabidopsis thaliana* plants ecotype Columbia-0 (Col-0), and the SL-  
131 insensitive *A. thaliana max2-1* mutant (EMS mutant in Col-0-background; Stirnberg *et al.*, 2002)  
132 kindly provided by Prof. H. Koltai, were used in this study. MT dynamics were recorded in

133 seedlings stably expressing a *35S::GFP-MBD* (MT-binding domain of mammalian non-neuronal  
134 MICROTUBULE ASSOCIATED PROTEIN4), or a *35S::TUA6-GFP* construct ( $\alpha$ -TUBULIN 6)  
135 (Marc *et al.*, 1998; Shaw *et al.*, 2003). Mutant plants of *max2-1* were crossed with lines carrying  
136 *35S::GFP-MBD* or *35S::TUA6-GFP* constructs. For microscopy studies the F3 generation of the  
137 progenies was used. Homozygous *max2-1* seedlings expressing the above MT markers were  
138 selected according to fluorescence detection under epifluorescence microscope.

139 Prior to germination, seeds were sterilized in 1% v/v sodium hypochlorite solution  
140 supplemented with 0.1% v/v Tween-20 for 10 min, short-spin vortexed, immersed to 70% v/v  
141 ethanol for 5 s, thoroughly rinsed 5 times by MilliQ water and placed to 0.6% w/v agarose-  
142 solidified  $\frac{1}{2}$  Murashige and Skoog medium ( $\frac{1}{2}$  MS; Duchefa, the Netherlands) with 10% w/v  
143 sucrose with or without exogenous synthetic SL and/or inhibitors of endogenous SL  
144 biosynthesis.

145

#### 146 *Chemical treatment*

147 Unless stated otherwise, all common chemicals were from Sigma-Aldrich (the USA) and  
148 were of analytical grade. A synthetic specific SL *cis*-GR24 consisting only of D14-perceived  
149 GR24+ was synthesized according to Zwanenburg *et al.*, 2013 was dissolved *ex tempore* in pure  
150 anhydrous acetone to prepare a 10 mM stock solution from which working concentrations of 3  
151 and 25  $\mu$ M were prepared. Four-day-old seedlings were taken from 0.6% w/v agarose-solidified  
152 media, treated with GR24 and prepared for microscopy. A triazole-type SL biosynthesis inhibitor  
153 designated as TIS108 (Chiralix, the Netherlands) was dissolved in pure anhydrous acetone prior  
154 to use to obtain 10 mM stock solution further diluted to 3  $\mu$ M final concentration and added to  
155 agarose-solidified  $\frac{1}{2}$  MS medium or used for short-time treatment in liquid MS. Petri dishes with  
156 seeds were stored at 4°C for 1 day to synchronize germination and then germinated at a vertical  
157 position in Phytotron at 22°C under long-day conditions (16 h light/8 h darkness, photosynthetic  
158 photon flux (PPF): 150  $\mu$ mol m<sup>-2</sup> s<sup>-1</sup>) for 4 or 7 days prior to imaging. For the etiolation  
159 experiment, Petri dishes were wrapped in aluminum foil after seeding, stratified at 4°C for 2–4  
160 days, and germinated as such under the same environmental conditions.

161

#### 162 *Hypocotyl growth analysis*

163 Petri dishes with 3-7 day old seedlings were placed in scanner (Image Scanner III, Seiko  
164 Epson, Japan) and scanned at transmitted light mode in order to document and subsequently  
165 quantify hypocotyl length. For hypocotyl width measurements, seedlings were documented with  
166 differential interference contrast of a widefield microscope (Axio Imager M2, Carl Zeiss,  
167 Germany) equipped with a polarizer and a Wollaston prism at three distinct parts of the  
168 hypocotyl: the upper part – situated right beneath the cotyledon petiole; the middle part – at the  
169 mid-plane of hypocotyl, and the lower part– at the border with the primary root.

170 For the detailed morphological studies 4- and 7-days old seedlings were captured using  
171 Axio Zoom.V16 Stereo Zoom system (Carl Zeiss, Germany) in bright field illumination  
172 (objective lenses PlanApo Z 1.5x, FWD = 30mm). The measurements were done using the  
173 default Measure application of ImageJ (Schneider et al. 2012) by tracking hypocotyls with the  
174 segmented line tool after appropriate scale calibration using the Set Scale tool of the Analyze  
175 menu.

176

### 177 *Microscopy*

178 For live imaging of MTs four different Zeiss microscopy platforms (Zeiss Microscopy,  
179 Germany) were used (Komis et al., 2014; 2015). For deciphering MT organization, GFP-MBD  
180 or TUA6-GFP molecular markers were visualized by means of CLSM with the LSM710 system  
181 (Carl Zeiss, Germany) equipped with a 63× Plan-Apochromat oil-immersion objective (1.4 NA)  
182 under excitation 488/543 nm, emission 510/540 nm. Laser excitation intensity did not exceed 2%  
183 of the laser intensity range available. Range of the Z-stack was always set up to 0.61 μm. GFP-  
184 labelled MT were imaged using excitation laser line 488 nm and emission spectrum 493-630 nm  
185 for GFP fluorescence detection and with excitation laser line 405 nm and emission spectrum  
186 410-495 nm for DAPI fluorescence detection.

187 Microscopy platform enabling SIM (ELYRA PS.1, Carl Zeiss, Germany) with 63× Plan-  
188 Apochromat oil-immersion objective was used for the time-lapse observations of MT dynamics.  
189 4-days old seedlings were mounted between a microscope slide and a coverslip in 30 μL of  
190 liquid MS medium spaced by double-sided sticky tape, narrow Parafilm stripes and extra sealed  
191 using liquid petroleum jelly (nail polish) to form a chamber prior to imaging for sample  
192 stabilization. This prevented dislocation of the plantlets during liquid exchange and allowed the



193 observation of the same area during 2 h. Seedlings were grown at solidified GR24/TIS108-  
194 containing media for 4 d.

195 All preparations with the etiolated seedlings were done quickly in dark room using dim  
196 red or green light to prevent disturbances of MT by visible light.

197

#### 198 *Post-acquisition image processing*

199 Raw SIM images were processed automatically by the respective add-on of the licensed  
200 Zen software (Black version; Carl Zeiss, Germany) coupled to the Elyra PS.1, according to  
201 standards thoroughly described before (Komis et al., 2014; 2015).

202 Kymographs of MT time series recordings were generated using the Kymograph add-on  
203 of the licensed Zen software (Blue version; Carl Zeiss, Germany), using the arrow tool to  
204 delineate individual or bundled MT of interest.

205

#### 206 *Quantitative analysis of microtubule organization*

207 MT organization was quantitatively addressed by assessing the extend of MT bundling as  
208 the skewness of fluorescence distribution of GFP-MBD expressing cells. Skewness was  
209 extrapolated from values provided by the Histogram add-on of licensed Zen software (Blue  
210 version). Additionally, cortical MT ordering was quantitatively assessed by measuring MT  
211 organization anisotropy. This anisotropy was demonstrated in full frames of CSLM images of  
212 hypocotyl cells expressing GFP-MBD, which were analyzed with Cytospectre freeware  
213 (Kartasalo *et al.*, 2015) to extrapolate their angular distribution in the cortical cytoplasm.  
214 Quantitatively, the ordering of cortical MT was measured through the FibrilTool macro as  
215 described previously (Boudaoud *et al.*, 2014). Briefly, the FibrilTool macro was applied on  
216 regions of interests drawn using the Polygon tool of Image J delineating the circumference of  
217 fully visible cells. Care was taken, to avoid cell edges, where frequently the signal is saturated.  
218 Theoretically the numerical result ranges between 0 (complete isotropy) to 1 (perfect  
219 anisotropy).

220

#### 221 *Quantitative analysis of microtubule dynamics*

222 Kymographs from recordings of dynamic MT were used to extrapolate the following  
223 parameters of MT dynamics: growth and shrinkage rates, catastrophe and rescue frequencies.

224 Kymograph analysis was done manually using the Image J angle measure tool after size  
225 calibration of kymographs. Angles were acquired in degrees and converted to radians in MS  
226 Excel (Microsoft, the USA) prior to calculations of tangential values. Briefly, the equations used  
227 were as follows:

228 For growth rate, the equation was:  $G = \tan \varphi \times pixel\ size \times fps$ ; where  $\tan \varphi$  is the  
229 tangential of the growth slope, pixel size is in  $\mu\text{m}$  and fps is the frame rate of the acquisition  
230 (frames $\times$ sec $^{-1}$ ). The final output is converted to  $\mu\text{m}\times\text{min}^{-1}$  by multiplying the original value with  
231 60 sec $\times$ min $^{-1}$ .

232 For shrinkage rate, the equation was:  $S = \tan \theta \times pixel\ size \times fps$ ;  $\tan \theta$  is the tangential  
233 of the shrinkage slope, pixel size is in  $\mu\text{m}$  and fps is the frame rate of the acquisition  
234 (frames $\times$ sec $^{-1}$ ). The final output is converted to  $\mu\text{m}\times\text{min}^{-1}$  by multiplying the original value with  
235 60 sec $\times$ min $^{-1}$ .

236 For catastrophe frequency the following equation was applied:

$$237 f_{cat} = \frac{N_{cat}}{\Sigma t_{growth}},$$

238 where  $f_{cat}$  is the catastrophe frequency,  $N_{cat}$  is the total number of catastrophe events and  $\Sigma t_{growth}$   
239 is the total time spent in growth, regarding all the growth events taken into account.

240 For rescue frequency the following equation was applied:

$$241 f_{res} = \frac{N_{res}}{\Sigma t_{shrinkage}},$$

242 where  $f_{res}$  is the rescue frequency,  $N_{res}$  is the total number of rescue events and  $\Sigma t_{shrinkage}$  is the total  
243 time spent in shrinkage, regarding all the shrinkage events taken into account.

244

## 245 *Statistics*

246 Statistical analysis of all datasets was performed in the software STATISTICA (version  
247 13.4.0.14; Statsoft, the USA). All datasets were first subjected to Shapiro-Wilk W test and  
248 Levene's tests to test the normality and homogeneity. Frequently, the datasets failed to pass these  
249 tests. On several representative datasets, following tests were calculated: (i) one-way ANOVA,  
250 (ii) Welch's ANOVA, (iii) Tukey's post hoc test corrected for unequal sample size, (iv) Scheffé's  
251 post hoc test, (v) Kruskal-Wallis test. Based on results of these preliminary analysis, and in  
252 agreement with previous reports (Liu, 2015), Welch's ANOVA followed by Scheffé's test was  
253 used as it exhibited higher stringency compared to other tests. Statistical significance was

254 determined based on the calculated p-values, were for Welch's ANOVA the probability level was  
255 0.05 and for Scheffé's test the probability level was 0.01. For comparing two different  
256 experimental conditions (light-dark and inhibitor treatment), two-way ANOVA followed by  
257 Scheffé's test was used. In this case, the probability level set for Scheffé's test was 0.001.

258

## 259 **Results**

### 260 *Strigolactone treatment affects hypocotyl growth in Arabidopsis*

261 Col-0 and *max2-1* mutant seedlings were germinated and cultivated on medium  
262 containing different concentrations of GR24 or TIS108, either in the standard light/dark regime  
263 of the phytotron or in the dark. Under the light/dark regime, GR24 used at two different  
264 concentrations (3 and 25  $\mu$ M), stalled hypocotyl elongation and induced mild radial swelling as  
265 compared to mock-treated Col-0 (Fig. 1A,I cf. Fig. 1B,C,J,K). Growth inhibition of the  
266 hypocotyl was also evident after treatment with the inhibitor TIS108 tested in two concentrations  
267 (Fig. 1D,L). In quantitative terms, the hypocotyl length of mock treated Col-0 seedlings was  
268  $2.05 \pm 0.145$  mm (mean $\pm$ SD; Fig. 1Q; N=75; Supplementary Table S1). After treatment with 3  
269  $\mu$ M GR24, the hypocotyl length was significantly reduced to  $1.28 \pm 0.158$  mm (mean $\pm$ SD; Fig.  
270 1Q;  $p=0.0000$ ; N=60), while after treatment with 25  $\mu$ M the hypocotyl length comprised  
271  $1.307 \pm 0.178$  (mean $\pm$ SD; Fig. 1Q; N=56), which was significantly different compared to mock-  
272 treated Col-0, but not to the effect of 3  $\mu$ M GR24 ( $p=0.0000$  and  $p=0.9992$ , respectively). In  
273 turn, TIS108 treatment resulted in the most severe hypocotyl growth inhibition measured to  
274  $0.783 \pm 0.160$  mm (mean $\pm$ SD; Fig. 1Q; N=61), being significantly different from all other  
275 conditions tested ( $p=0.0000$  as compared to treatment with 3 and 25  $\mu$ M GR24). Hypocotyl  
276 width was only slightly affected by any of the treatments used herein. Briefly the width of mock-  
277 treated Col-0 hypocotyls was  $0.309 \pm 0.04$  mm (Fig. 1R; N=58; Supplementary Table S2),  
278  $0.325 \pm 0.07$  mm after treatment with 3  $\mu$ M GR24 (Fig. 1R; N=89),  $0.290 \pm 0.08$  mm after  
279 treatment with 25  $\mu$ M GR24 (Fig. 1R; N=90) and  $0.323 \pm 0.05$  mm after treatment with 3  $\mu$ M  
280 TIS108.

281 Subsequently we characterized hypocotyl growth in light-exposed *max2-1* mutants. In  
282 such mock-treated mutants (Fig. 1E) as well as after the treatment with both 3 (Fig. 1F) and 25  
283  $\mu$ M GR24 (Fig. 1G), the hypocotyl length was comparable to mock-treated Col-0 seedlings. The  
284 hypocotyl length of *max2-1* mutant seedlings was only responsive to treatment with 3  $\mu$ M

285 TIS108 (Fig. 1H). Meanwhile, hypocotyl width does not show any noticeable changes at any  
286 treatment used (Fig. 1M–P). In quantitative terms, the hypocotyl length of mock-treated *max2-1*  
287 mutants was  $2.16 \pm 0.19$  mm (mean $\pm$ SD; N=78),  $2.06 \pm 0.17$  mm after 3  $\mu$ M GR24 (mean $\pm$ SD;  
288 N=69),  $1.98 \pm 0.17$  mm after 25  $\mu$ M GR24 (mean $\pm$ SD; N=80), and  $0.74 \pm 0.16$  mm after 3  $\mu$ M  
289 TIS108 (mean $\pm$ SD; N=59) treatments. The hypocotyl length of *max2-1* mutants was significantly  
290 different at all GR24 and TIS108 treatments as compared to the treated Col-0 seedlings (Fig. 1Q;  
291  $p=0.185$  after mock treatment,  $p=0.9999$  after 3  $\mu$ M GR24,  $p=0.2333$  after 25  $\mu$ M GR24, and  
292  $p=0.0000$  after 3  $\mu$ M TIS108 treatments). Within the *max2-1* population, GR24 treatments did  
293 not affect hypocotyl length (Fig. 1Q) and only treatment with 3  $\mu$ M TIS108 brought about its  
294 significant shortening (Fig. 1Q). In terms of hypocotyl width, no changes were discerned (Fig.  
295 1R).

296

### 297 *Strigolactone effects are modulated in dark-grown seedlings*

298 There have been reports of a synergy between exogenous application of SL and the  
299 illumination conditions during seedling growth. Therefore, the experimental regime of the  
300 treatment of Col-0 and *max2-1* seedlings with two different concentrations of GR24 (3 and 25  
301  $\mu$ M) and with 3  $\mu$ M TIS108 grown under persistent darkness was tested.

302 As expected, hypocotyl length elongation of etiolated seedlings exceeds that of light-  
303 grown seedlings (Fig. 2A). By combining visual documentation and quantitative analysis, it  
304 became evident that etiolated seedlings were also responsive to treatments with 3 (Fig. 2B,I) and  
305 25  $\mu$ M GR24 (Fig. 2C,I), but were the most sensitive to 3  $\mu$ M TIS108 (Fig. 2D,I). The length of  
306 mock-treated etiolated Col-0 seedlings was  $15.45 \pm 1.77$  mm (mean $\pm$ SE; N=78),  $14.09 \pm 1.22$  mm  
307 after treatment with 3  $\mu$ M GR24 (mean $\pm$ SE; N=75),  $11.23 \pm 1.54$  mm after 25  $\mu$ M GR24  
308 (mean $\pm$ SE; N=77), and  $2.55 \pm 0.72$  mm after 3  $\mu$ M TIS108 (N=13). All the treatments caused  
309 significant reduction of the etiolated hypocotyl length as compared to the mock treatment (Fig.  
310 2I;  $p=0.0000$  for 3  $\mu$ M GR24;  $p=0.0000$  for 25  $\mu$ M GR24;  $p=0.0000$  for 3  $\mu$ M TIS108;  
311 Supplementary Table S3).

312 The same line of experiments was applied in the case of *max2-1* mutants (Fig. 2E–H),  
313 which also proved to be prone to either the application of exogenous SL, or to the metabolic  
314 inhibition of SL biosynthesis. Compared to mock treated *max2-1* seedlings (Fig. 2E,I), which  
315 exhibited length of  $15.95 \pm 1.64$  mm (mean $\pm$ SD; N=23), those treated with 3  $\mu$ M GR24 (Fig. 2F,I)

316 were  $15.72 \pm 1.12$  mm (mean $\pm$ SD; N=30), those treated with 25  $\mu$ M GR24 (Fig. 2G,I) were  
317  $10.05 \pm 1.66$  mm (mean $\pm$ SD; N=22), while those treated with 3  $\mu$ M TIS108 (Fig. 2H,I) were  
318  $3.07 \pm 0.66$  mm (mean $\pm$ SD; N=19). The effect of most treatments on hypocotyl length of etiolated  
319 *max2-1* seedlings was deemed to be significant by comparison to the mock treatment except for  
320 3  $\mu$ M GR24 (Fig. 2I;  $p=0.9998$  for 3  $\mu$ M GR24; and  $p=0.0000$  for both 25  $\mu$ M GR24 and 3  $\mu$ M  
321 TIS108).

322 Such preliminary deductions make the assessment of whether light plays a crucial role on  
323 the modulation of SL effects. For this reason, we examined the extent of its effect on the  
324 percentage of hypocotyl reduction of either light- or dark-grown Col-0 or *max2-1* mutant  
325 seedlings by comparison to the mock treatment. Thus, under the light exposure combined with 3  
326  $\mu$ M GR24 treatment the reduced hypocotyl length was observed, comprising  $63.33 \pm 9.68\%$  in  
327 Col-0 (Supplementary Fig. 1A) and  $93.01 \pm 12.48\%$  in etiolated seedlings (Supplementary Fig.  
328 1B) as compared to mock-treated seedlings. Similarly, the treatment with 25  $\mu$ M GR24 caused  
329 the reduction of hypocotyl length up to  $64.35\% \pm 9.63\%$  of mock-treated seedlings under light  
330 exposure, but this reduction was less pronounced in dark (cf.  $74.00\% \pm 13.69\%$  of mock treated  
331 seedlings). TIS108 treatment caused hypocotyl length reduction in light up to  $38.55\% \pm 8.17\%$  of  
332 mock-treated seedlings, and even more pronounced reduction in the dark, since the treated  
333 etiolated hypocotyls were  $23.90\% \pm 4.61\%$  of the mock-treated counterparts.

334 Regarding the light-exposed *max2-1* mutant, hypocotyl length of seedlings treated with 3  
335  $\mu$ M GR24 (Supplementary Fig. 1C) was  $96.65\% \pm 11.09\%$  of mock-treated seedlings, of those  
336 treated with 25  $\mu$ M GR24 –  $91.88\% \pm 10.55\%$ , and of those treated with 3  $\mu$ M TIS108 –  
337  $34.72\% \pm 8.02\%$ , respectively. Moreover, hypocotyl length of etiolated *max2-1* seedlings  
338 (Supplementary Fig. 1D) after the treatment with 3  $\mu$ M GR24 was  $97.38\% \pm 6.92\%$  of mock-  
339 treated seedlings, of those treated with 25  $\mu$ M GR24 –  $63.18\% \pm 6.39\%$ , and of those treated with  
340 3  $\mu$ M TIS108 –  $19.74\% \pm 3.19\%$ , respectively.

341 These results revealed the extent of GR24 and TIS108 effects on hypocotyl elongation,  
342 showing that etiolated Col-0 seedlings are less responsive to GR24 as compared to light-grown  
343 ones, while at the same time they were more sensitive to TIS108 treatment. In addition, *max2-1*  
344 mutants were equally unresponsive to 3  $\mu$ M GR24, however, both 25  $\mu$ M GR24 and 3  $\mu$ M  
345 TIS108 caused much stronger inhibitory effect in etiolated seedlings.

346

347 *Strigolactone affects microtubule organization in light-dependent manner*

348 Inducible growth alterations following extrinsic stimulation as, e.g., with hormonal  
349 treatments, has been repeatedly shown to be preceded and supported by conditional  
350 rearrangements of cortical MT, which tend to keep the predominant orientation (e.g., Lindeboom  
351 *et al.*, 2013; True and Shaw, 2020). Such conditions favouring the parallel arrangement of  
352 cortical MT can be documented by showing the patterns of their angular distribution and  
353 quantified by measuring the degree of anisotropy within the cortical array.

354 In light-grown, mock-treated Col-0 seedlings expressing a GFP-MBD MT marker,  
355 cortical MT exhibit a more or less random distribution (Fig. 3A,E) with the tendency of more  
356 biased reorganization after treatment with 3 (Fig. 3B,F) and 25  $\mu$ M GR24 (Fig. 3C,G), and 3  $\mu$ M  
357 TIS108 (Fig. 3D,H). By contrast, *max2-1* mutants expressing the same MT marker appeared to  
358 have more organized cortical MT as compared to Col-0 either after mock treatment (Fig. 3I,M)  
359 and treatments with 3 (Fig. 3J,N) and 25  $\mu$ M GR24 (Fig. 3K,O), and 3  $\mu$ M TIS108 (Fig. 3L,P).

360 The qualitative observations mentioned above were quantitatively corroborated by  
361 measuring changes in the anisotropy of MT organization. In mock-treated Col-0 anisotropy was  
362  $0.12 \pm 0.06$  (Fig. 3Q; mean $\pm$ SD; N=54), after treatment with 3  $\mu$ M GR24 it became  $0.17 \pm 0.08$   
363 (Fig. 3Q; mean $\pm$ SD; N=71), and  $0.016 \pm 0.08$  (Fig. 3Q; mean $\pm$ SD; N=54) and  $0.15 \pm 0.07$  (Fig.  
364 3Q; mean $\pm$ SD; N=75) after 25  $\mu$ M GR24 and 3  $\mu$ M TIS108 treatments, respectively. In light-  
365 grown Col-0 seedlings all treatments significantly promoted anisotropy within the cortical MT  
366 array as compared to the mock treatment (Fig. 3Q;  $p=0.005$  for 3  $\mu$ M GR24;  $p=0.0375$  for 25  
367  $\mu$ M GR24;  $p=0.2381$  for 3  $\mu$ M TIS108).

368 Oppositely, light-grown mock-treated *max2-1* seedlings exhibited more biased arrays as  
369 compared to mock-treated Col-0 seedlings (e.g., Fig. 3I,M), but all treatments (Fig. 3J-P) caused  
370 anisotropy reduction to values comparable to those of Col-0, again at significant values (Fig. 3R;  
371  $p=0.0000$  for 3  $\mu$ M GR24; and  $p=0.0000$  for both 25  $\mu$ M GR24 and 3  $\mu$ M TIS108). In this case  
372 cortical MT anisotropy was  $0.31 \pm 0.1$  after mock treatment (Fig. 3R; mean $\pm$ SD; N=35), but was  
373 significantly reduced to  $0.17 \pm 0.07$  after treatment with 3  $\mu$ M GR24 (Fig. 3R; mean $\pm$ SD; N=31),  
374 to  $0.14 \pm 0.07$  after 25  $\mu$ M of GR25 (Fig. 3R; mean $\pm$ SD; N=61), and to  $0.13 \pm 0.06$  for 3  $\mu$ M  
375 TIS108 (Fig. 3R; mean $\pm$ SD; N=79).

376 In Col-0 etiolated seedlings the degree of cortical MT organization is much more  
377 pronounced as compared to light-grown seedlings. In mock-treated seedlings (Fig. 4A,E),  
378 cortical MT are largely parallel to each other at variable orientations to the main cell axis, and  
379 this pattern seems to be unaffected in seedlings treated with 3  $\mu$ M GR24 (Fig. 4B,F), 25  $\mu$ M  
380 GR24 (Fig. 4C,G) and 3  $\mu$ M TIS108 (Fig. 4D,H). Similarly, etiolated seedlings of *max2-1*  
381 mutant exhibit highly organized systems of parallel MT, at seemingly the same level of  
382 organization comparing to mock-treatment (Fig. 4I,M) or treatments with 3  $\mu$ M GR24 (Fig.  
383 4J,N), 25  $\mu$ M GR24 (Fig. 4K,O) and 3  $\mu$ M TIS108 (Fig. 4L,P). Indeed, this observation was  
384 reflected to the level of cortical MT anisotropy, which in Col-0 was statistically similar between  
385 all cases (Fig. 4Q;  $0.29 \pm 0.11$ , N=27 for mock-treated Col-0;  $0.33 \pm 0.15$ , N=42 for Col-0 treated  
386 with 3  $\mu$ M GR24;  $0.27 \pm 0.12$ , N=47 for Col-0 treated with 25  $\mu$ M GR24; and  $0.34 \pm 0.09$  for Col-  
387 0 treated with 3  $\mu$ M TIS108; mean $\pm$ SD). In all cases, anisotropy of cortical MT organization was  
388 equally high in etiolated seedlings of the *max2-1* mutant with minor variations within this group  
389 of treatments (Fig. 4R). Thus, anisotropy values were  $0.29 \pm 0.08$  for mock-treated seedlings  
390 (mean $\pm$ SD; N=29),  $0.31 \pm 0.14$  (mean $\pm$ SD; N=54) after treatment with 3  $\mu$ M GR24,  $0.31 \pm 0.12$   
391 (mean $\pm$ SD; N=51) after 25  $\mu$ M GR24, and  $0.32 \pm 0.11$  (mean $\pm$ SD) after 3  $\mu$ M TIS108 (Fig. 4R).  
392 Next, in *max2-1* seedlings only the anisotropy of those treated with 3  $\mu$ M GR24 was found to be  
393 different compared to mock-treated ones ( $p=0.0280$ ), but not compared to the other treatments,  
394 which were similar to the mock. In both cases, it seems that etiolation promotes the biased  
395 organization of cortical MT irrespectively of treatments modulating SL activity.

396

### 397 *Strigolactone content alterations interfere with microtubule bundling*

398 From the putative mechanisms underlying MT reorganization, bundling is one of the  
399 possibilities and it can be related to changes in the distribution of fluorescence intensity  
400 frequencies. Uniform labelling results in somewhat normal distribution, while clustered labelling  
401 is linked to increasingly skewed distribution, depending on the degree of non-uniformity of the  
402 signal. We quantified skewness of fluorescence distribution in hypocotyl cells of either Col-0 or  
403 *max2-1* untreated or treated with 3 and 25  $\mu$ M GR24 or 3  $\mu$ M TIS108 under light or darkness.

404 In light-grown Col-0 cells all treatments induced significantly higher skewness of the  
405 fluorescent signal as compared to mock-treated cells. In such mock-treated cells (Fig. 5A),  
406 skewness was  $0.80 \pm 0.34$  (Fig. 5I; mean $\pm$ SD; N=32), while after treatment with 3  $\mu$ M GR24 (Fig.

407 5B) it was  $1.73 \pm 0.23$  (Fig. 5I; mean $\pm$ SD; N=31), and after treatments with 25  $\mu$ M GR24 (Fig.  
408 5C) and 3  $\mu$ M TIS108 (Fig. 5D) it was  $1.74 \pm 0.34$  (Fig. 5I; mean $\pm$ SD; N=17) and  $1.78 \pm 0.26$  (Fig.  
409 5I; mean $\pm$ SD; N=51), respectively. It is noteworthy that the effects of all treatments were  
410 significantly different compared to the mock treatment (Fig. 5I;  $p=0.0000$  for 3  $\mu$ M GR24, 25  
411  $\mu$ M GR24, and 3  $\mu$ M TIS108), though comparable to each other. The skewness of fluorescent  
412 signal from GFP-MBD lines in *max2-1* mutant background was significantly higher compared to  
413 Col-0 (Fig. 5E-H,J;  $p=0.0000$  for all treatments), but at comparable levels within all treatments in  
414 the *max2-1* group (Fig. 5K). The increase of skewness in the Col-0 group might be relevant to  
415 the inducible increase of cortical MT anisotropy and may also underlie the intrinsically higher  
416 order of cortical MT organization of the *max2-1* mutant compared to Col-0. At the same time, it  
417 does not seem to correlate with the loosening of MT organization within the *max2-1* group after  
418 the interference with either SL signalling or biosynthesis.

419 In dark-grown seedlings of either Col-0 or *max2-1* mutants, skewness of fluorescence  
420 distribution of GFP-MBD-labelled cortical MT was comparable between both groups with no  
421 statistically significant difference (Fig. 6). In detail, mock-treated Col-0 cells showed a skewness  
422 value of  $1.49 \pm 0.3$  (Fig. 6A,I; mean $\pm$ SD; N=57), while  $1.52 \pm 0.3$  (Fig. 6B,I; mean $\pm$ SD; N=58) –  
423 after the treatment with 3  $\mu$ M GR24,  $1.58 \pm 0.36$  (Fig. 6C,I; mean $\pm$ SD; N=24) – after 25  $\mu$ M  
424 GR24, and  $1.55 \pm 0.31$  (Fig. 6D,I; mean $\pm$ SD; N=22) – after 3  $\mu$ M TIS108. Similarly, etiolated  
425 mock-treated *max2-1* seedlings (Fig. 6E) showed fluorescence skewness of  $1.71 \pm 0.31$  (Fig. 6J;  
426 mean $\pm$ SD; N=31),  $1.71 \pm 0.30$  (Fig. 6J; mean $\pm$ SD; N=39) after treatment with 3  $\mu$ M GR24 (Fig.  
427 6F),  $1.73 \pm 0.29$  (Fig. 6J; mean $\pm$ SD; N=34) after 25  $\mu$ M GR24 (Fig. 6G), and  $1.71 \pm 0.35$  (Fig. 6J;  
428 mean $\pm$ SD; N=47) after 3  $\mu$ M TIS108 (Fig. 6H). Although skewness values of *max2-1* etiolated  
429 seedlings were consistently higher than those of the Col-0 group, the differences inferred were  
430 not significant (Fig. 6K). These results are partially consistent with the mild effects of exogenous  
431 SL or SL biosynthesis inhibitor on the anisotropy of MT organization in etiolated seedlings.

432

### 433 *Strigolactones are involved in the regulation of cortical microtubule dynamics*

434 MT dynamics were followed by means of time-lapsed SIM in hypocotyl cells of dark-  
435 grown Col-0 or *max2-1* mutants both stably expressing the GFP-MBD MT marker. Using a  
436 frame rate of ca. 0.4 frames per second (fps) it was possible to record time series of end-wise



437 length excursions of individual or bundled MT and quantify measures of plus end dynamic  
438 instability using appropriately generated kymographs.

439 In mock-treated Col-0 hypocotyl epidermal cells expressing GFP-MBD (Fig. 7A,B;  
440 Supplementary Movie 1) plus end growth and shrinkage rates as well as catastrophe and rescue  
441 frequencies measured from appropriate kymographs (Fig. 7C,D) were within previously  
442 published values. Briefly, the average growth rate was  $5.46 \pm 2.76 \mu\text{m} \times \text{min}^{-1}$  (mean $\pm$ SD; N=53  
443 MT ends), while the average shrinkage rate was  $16.48 \pm 6.25 \mu\text{m} \times \text{min}^{-1}$  (mean $\pm$ SD; N=50 MT  
444 ends). Furthermore, catastrophe frequency was  $0.0122 \text{ events} \times \text{sec}^{-1}$ , while rescue frequency was  
445  $0.0512 \text{ events} \times \text{sec}^{-1}$ . In both cases of GR24 treatment (3 and 25  $\mu\text{M}$ ) plus end MT dynamics  
446 were considerably slowed during both growth and shrinkage. At the concentration of 3  $\mu\text{M}$  (Fig.  
447 7E-H, Supplementary Movie 2) the average growth rate was  $2.05 \pm 0.96 \mu\text{m} \times \text{min}^{-1}$  (mean $\pm$ SD;  
448 N=50 MT ends), and the average shrinkage rate was  $12 \pm 8 \mu\text{m} \times \text{min}^{-1}$  (mean $\pm$ SD; N=50 MT  
449 ends). Catastrophe frequency was  $0.0082 \text{ events} \times \text{sec}^{-1}$ , while rescue frequency was  $0.0332$   
450  $\text{events} \times \text{sec}^{-1}$ . At 25  $\mu\text{M}$  (Fig. 7I-L, Supplementary Movie 3) the average growth rate was  
451  $2.01 \pm 1.23 \mu\text{m} \times \text{min}^{-1}$  (mean $\pm$ SD; N=59 MT ends) and the average shrinkage rate was  $6.23 \pm 5.46$   
452  $\mu\text{m} \times \text{min}^{-1}$  (mean $\pm$ SD; N=42 MT ends). Catastrophe frequency was  $0.0078 \text{ events} \times \text{sec}^{-1}$ , while  
453 rescue frequency was  $0.0288 \text{ events} \times \text{sec}^{-1}$ . The biosynthetic inhibitor TIS108 (Fig. 7M-P,  
454 Supplementary Movie 4) strongly inhibited MT plus end dynamic parameters. In general, the  
455 average growth rate was  $0.70 \pm 0.32 \mu\text{m} \times \text{min}^{-1}$  (mean $\pm$ SD; N=33 MT ends) and the average  
456 shrinkage rate was  $4.59 \pm 5.42 \mu\text{m} \times \text{min}^{-1}$  (mean $\pm$ SD; N=28 MT ends). Catastrophe frequency was  
457  $0.0077 \text{ events} \times \text{sec}^{-1}$  while rescue frequency was  $0.0255 \text{ events} \times \text{sec}^{-1}$ .

458 By comparison to mock-treated cells, both parameters of MT dynamics were in most  
459 cases significantly reduced in all treatments tested (Fig. 7Q for growth rate and Fig. 7R for  
460 shrinkage rate). In terms of growth rate (Fig. 7Q) both concentrations of GR24 showed  
461 comparable reduction as compared to mock treatment, while growth rates were even more  
462 reduced in the case of treatment with TIS108 (Fig. 7Q;  $p=0.0000$  for 3  $\mu\text{M}$  GR24; 25  $\mu\text{M}$  GR24  
463 and 3  $\mu\text{M}$  TIS108). Shrinkage rates were also reduced in all treatments (Fig. 7R;  $p=0.0108$  for 3  
464  $\mu\text{M}$  GR24; and  $p=0.0000$  for both 25  $\mu\text{M}$  GR24 and 3  $\mu\text{M}$  TIS108).

465 The most striking feature of GFP-MBD MT in the *max2-1* mutant was the significantly  
466 lower growth rate and most importantly the long-sustained growth periods of nearly every MT

467 examined. The prolonged elongation of cortical MT was clearly evident in mock-treated *max2-1*  
468 seedlings (Fig. 8A–E, Supplementary Movie 5) with the average growth rate being  $2.09 \pm 1.27$   
469  $\mu\text{m} \times \text{min}^{-1}$  (mean  $\pm$  SD; N= 32 MT ends) and the average shrinkage rate being  $8.48 \pm 7.06$   $\mu\text{m} \times \text{min}^{-1}$   
470 (mean  $\pm$  SD; N= 54 MT ends). In such seedlings, the catastrophe frequency was  $0.0087$   
471  $\text{events} \times \text{sec}^{-1}$  and the rescue frequency was  $0.0266$   $\text{events} \times \text{sec}^{-1}$ . However, the exogenous  
472 application of GR24 at either 3 or 25  $\mu\text{M}$ , or the treatment with TIS108, had no effect on any  
473 parameter of MT dynamics compared to mock-treated *max2-1* cells. Briefly, in *max2-1* seedlings  
474 treated with 3  $\mu\text{M}$  GR24 (Fig. 8F–K, Supplementary Movie 6), the average growth rate was  
475  $2.25 \pm 1.35$   $\mu\text{m} \times \text{min}^{-1}$  (mean  $\pm$  SD; N=134 MT ends) and the average shrinkage rate was  $9.03 \pm 7.38$   
476  $\mu\text{m} \times \text{min}^{-1}$  (mean  $\pm$  SD; N=87 MT ends). In turn, catastrophe frequency was  $0.0071$   $\text{events} \times \text{sec}^{-1}$   
477 while rescue frequency was  $0.0301$   $\text{events} \times \text{sec}^{-1}$ . Similar was the situation of *max2-1* seedlings  
478 treated with 25  $\mu\text{M}$  (Fig. 8L–P, Supplementary Movie 7) where average growth was measured at  
479  $2.02 \pm 1.73$   $\mu\text{m} \times \text{min}^{-1}$  (mean  $\pm$  SD; N=167 MT ends), and average shrinkage rate was calculated to  
480 be  $9.34 \pm 6.76$   $\mu\text{m} \times \text{min}^{-1}$  (mean  $\pm$  SD; N=92 MT ends). Catastrophe and rescue frequencies were  
481  $0.0081$   $\text{events} \times \text{sec}^{-1}$  and  $0.0264$   $\text{events} \times \text{sec}^{-1}$ , respectively. As in the case of GR24, *max2-1*  
482 mutants were relatively insensitive to TIS108 treatment as well (Fig. 8Q–U, Supplementary  
483 Movie 8). Therefore, the growth rate was  $2.13 \pm 1.24$   $\mu\text{m} \times \text{min}^{-1}$  (mean  $\pm$  SD; N=41 MT ends) and  
484 the shrinkage rate was  $10.84 \pm 7.70$   $\mu\text{m} \times \text{min}^{-1}$  (mean  $\pm$  SD; N=20 MT ends). Catastrophe and  
485 rescue frequencies were  $0.0083$   $\text{events} \times \text{sec}^{-1}$  and  $0.0222$   $\text{events} \times \text{sec}^{-1}$ , respectively. As  
486 mentioned before, treatments had no significant effect on neither growth (Fig. 8V), nor shrinkage  
487 (Fig. 8W) within the *max2-1* group.

488 Uniformly, growth rates in Col-0 group were reduced compared to mock treatment in a  
489 similar manner to the growth rates of *max2-1* (Supplementary Fig. 2A;  $p=0.0000$  for 3  $\mu\text{M}$   
490 GR24, 25  $\mu\text{M}$  GR24, and 3  $\mu\text{M}$  TIS108). Reductions of shrinkage rates showed higher  
491 variability either comparing different experimental conditions within the Col-0 group, or by  
492 comparing the Col-0 group with the *max2-1* group (Supplementary Fig. 2B;  $p=0.1732$  for 3  $\mu\text{M}$   
493 GR24; and  $p=0.0000$  for both 25  $\mu\text{M}$  GR24 and 3  $\mu\text{M}$  TIS108).

494 Conclusively, the aforementioned results suggest that alterations in SL signaling either by  
495 chemical (GR24 and TIS108 treatments) or genetic (*max2-1* mutant) interference, uniformly

496 reduce MT dynamicity and likely promote MT longevity, as evidenced by the considerably lower  
497 catastrophe frequencies observed.

498

## 499 **Discussion**

500 Being produced mainly in the roots (Foo *et al.*, 2013) SL adjust both shoot (Gomez-  
501 Roldan *et al.*, 2008; Umehara *et al.*, 2008) and root (Ruyter-Spira *et al.*, 2011) development in  
502 vascular plants as well as in moss caulonema (Hoffman *et al.*, 2014) to changing environmental  
503 conditions. Early grafting experiments showed that SL are transported from roots to shoot in the  
504 xylem of Arabidopsis and tomato, which provided insight into SL signalling regulation via  
505 localization and transport (Kohlen *et al.*, 2011). SL may enhance and inhibit organ size and  
506 number depending upon the organ (rhizoid or caulonema; Hoffmann *et al.*, 2014). In this study,  
507 the role of SL in shaping shoot architecture via microtubular cytoskeleton rearrangement was  
508 addressed. However, the detailed mechanisms governing their regulation of plant development  
509 still remain to be elucidated.

510 The exogenous application of a synthetic SL (GR24; Umehara *et al.*, 2008) and an  
511 inhibitor of endogenous SL production (TIS108; a potent triazole-containing inhibitor of  
512 cytochrome P450 monooxygenases; Ito *et al.*, 2010; 2011; 2013), resulted in hypocotyl growth  
513 alterations in both Col-0 and a SL perception mutant in *MAX2*, a gene encoding a member of the  
514 F-box leucine-rich repeat protein family which is likely the substrate recognition subunit of SCF  
515 ubiquitin E3 ligase for targeted proteolysis at the proteasome (Stirnberg *et al.*, 2002; Wang Y *et al.*,  
516 *et al.*, 2013; Wang L *et al.*, 2015). Alleles of *max2* mutant are rendered insensitive to exogenous SL  
517 application in phenomena such as SL-induced inhibition of hypocotyl elongation (Jia *et al.*,  
518 2014; Wang L *et al.*, 2020), suppression of shoot branching (Wang Y *et al.*, 2013; Liu *et al.*,  
519 2014; Li *et al.*, 2016) and lateral root formation (Ruyter-Spira *et al.*, 2011; Li *et al.*, 2016).  
520 Moreover, recent works associated the function of *MAX2* with photomorphogenesis (Lopez-  
521 Obando *et al.*, 2018).

522 Previous studies on the effects of exogenous SL on vegetative growth have shown that  
523 compounds such as GR24 exert an inhibitory role on the skotomorphogenic elongation of the  
524 hypocotyl and on branching processes of either the shoot or the root culminating in the reduction  
525 of tillering and lateral root formation among others (Ruyter-Spira *et al.*, 2013; Jiang *et al.*, 2016;  
526 Sun *et al.*, 2019).

527           The effects of SL signalling manipulation were conspicuously evident in light-grown and,  
528 to lesser extent, in etiolated seedlings. Indeed, previous studies have shown that exogenous SL  
529 application halts hypocotyl elongation of light-grown seedlings in a dose-dependent manner,  
530 being notable at even lower concentrations as the ones used herein (e.g., at 100 nM; Jia *et al.*,  
531 2014). Importantly, *max2* mutant alleles show negligible response at low concentrations of  
532 exogenous SL and exhibited inhibition of hypocotyl elongations at concentrations exceeding 25  
533  $\mu$ M (Jia *et al.*, 2014). These results corroborate the previous studies on the synergy between SL  
534 and light perception (Brewer *et al.*, 2013) involving a correlation of SL perception with both  
535 phytochrome and cryptochrome light-dependent signalling (Jia *et al.*, 2014).

536           Diffuse organ growth (i.e., elongation or lateral expansion) is conditionally regulated by  
537 physical or hormonal signals and involves the positional control of cellulose microfibril  
538 deposition. In this sense, cortical MT have been repeatedly shown to underlie cell and organ  
539 growth rate and directionality as shown in the case of light (e.g., Sambade *et al.*, 2012;  
540 Lindeboom *et al.*, 2013; Ma *et al.*, 2018), mechanical stimulation (Louveau *et al.*, 2016;  
541 Takatani *et al.*, 2020), and hormonal cues including ethylene (Ma *et al.*, 2018; Wang X *et al.*,  
542 2020), auxin (True and Shaw, 2020) and gibberellins (Vineyard *et al.*, 2013; Locascio *et al.*,  
543 2013).

544           In light of the above, the present study was extended to address whether manipulation of  
545 SL signalling could be related to cytoskeletal remodelling, thus, the organization and the  
546 dynamics of cortical MT were studied in appropriate fluorescent marker lines of both Col-0 and  
547 *max2-1* mutants. In terms of organization, exogenous SL application and inhibition of  
548 endogenous SL biosynthesis under standard light/dark exposure did not affect significantly  
549 cortical MT orientation in Col-0 but had a prominent effect in *max2-1* mutants, promoting  
550 randomization of the cortical array. By contrast, MT bundling was enhanced after all treatments  
551 in Col-0 but remained unchanged in *max2-1* mutants, which seemingly exhibited a higher level  
552 of bundling than Col-0 in all circumstances. Notably, such MT organization features as ordering  
553 and bundling remained fairly unresponsive to the chemical treatments in etiolated seedlings of  
554 both Col-0 and *max2-1*. MT dynamics were considerably lowered after chemical manipulation of  
555 SL signalling in Col-0, while the inherently lower MT dynamics of *max2-1* remained  
556 unresponsive to GR24 and TIS108.

557 Owing to the previous connection of SL with phytochrome and cryptochrome light  
558 perception pathways, the differential responses of cortical MT to SL content alterations under  
559 light or dark growth conditions is expected. Earlier studies have already demonstrated the  
560 interdependence between phytochromes and light-induced MT reorientation (Fischer and  
561 Schopfer, 1997), while more recently, the reorientation of cortical MT under blue light  
562 stimulation was attributed to the stimulation of KATANIN-mediated MT severing via the  
563 activation of the PHOT1 and PHOT2 phototropin photoreceptors (Lindeboom *et al.*, 2013).

564 At present, the molecular components responsible for SL-mediated suppression of MT  
565 dynamics in *Arabidopsis* remain unknown. Its putative mechanisms are summarized in the  
566 hypothetical model of the interplay of light- and SL-induced pathways, which regulates the  
567 organization and dynamics of cortical microtubules resulting in the subsequent changes of  
568 hypocotyl growth and morphology (Fig. 9). The initial perception of SL in karrikin-independent  
569 pathway is provided by  $\alpha/\beta$  hydrolase AtD14 (Seto *et al.*, 2019), being activated by its binding  
570 with the ligand and able to form complex with one of the F-box protein MAX2 (reviewed by  
571 Kumar *et al.*, 2015a; Wang L *et al.*, 2020; Yoneyama *et al.*, 2020). Upon the assembly of the SCF  
572 complex including CULLIN1 (CUL1), Skp1 (S-phase kinase-associated protein 1) and E3  
573 ubiquitin-protein ligase RING-BOX1 (RBX1) it directs ubiquitin transfer from an E2 ligase onto  
574 target proteins, which leads to their proteasome degradation. SCF complex containing MAX2 is  
575 known to affect plant development via the degradation of SUPPRESSOR OF MORE  
576 AXILLARY GROWTH2-LIKE (SMLX) proteins (Wang L *et al.*, 2020). Another putative target  
577 protein for MAX2-mediated ubiquitination is one the key transcription factors of the  
578 brassinosteroid pathway, namely BRASSINAZOLE-RESISTANT 1 (BZR1), which directly  
579 targets and upregulates MICROTUBULE DESTABILIZING PROTEIN40 (MDP40), a positive  
580 regulator of hypocotyl cell elongation by altering the stability of cortical microtubules (Wang *et al.*,  
581 2012). The more pronounced randomization of cortical MT array, increased MT bundling  
582 and stabilization as well as reduced MT dynamicity and likely promoted MT longevity leading to  
583 the stalled hypocotyl elongation and mild radial swelling of epidermal cells might be regulated  
584 by this BZR1- MDP40 pathway branch as well.

585 Alternatively, SL pathway might interplay with the light-induced one via the different  
586 type of an E3 ligase complex consisting of CUL4, DAMAGE-BINDING PROTEIN 1 (DDB1)  
587 and CONSTITUTIVE PHOTOMORPHOGENIC 1 (COP1). The COP1 is subjected to regulation

588 by PHYTOCHROME A and B (PHYA/B), photoreceptors of red light, and  
589 CRYPTOCHROMES 1 and 2 (CRY1/2), photoreceptors of blue light (Podolec and Ulm, 2018).  
590 It has been previously proposed that COP1 might be regulated by the SCF complex containing  
591 MAX2 (Jia *et al.*, 2014). Moreover, E3 ligase complex including COP1 might target tubulin  
592 (Khanna *et al.*, 2014) as well as the proteins involved in cytoskeleton regulation such as  
593 phototropin-stimulated microtubule severing protein katanin (Lindeboom *et al.*, 2013) and  
594 microtubule-associated protein WAVE-DAMPENED 2-LIKE 3 (WDL3) that binds to, bundles  
595 and stabilizes microtubules (Liu *et al.*, 2013; Lian *et al.*, 2017). Future studies should elucidate  
596 the relationship between these two complexes.

597         However, another plausible explanation may refer to the physiological differences  
598 between hypocotyls and roots, especially in relation to the interplay between SL signalling and  
599 light perception. As mentioned previously, light-induced MT reorientations in aboveground  
600 tissues have been shown to correlate with phytochrome (Zandomeni and Schopfer, 1993; Fischer  
601 and Schopfer, 1997) and phototropin (Lindeboom *et al.*, 2013) signalling. The roots are also not  
602 indifferent to light, since dim light gradients may form at shallow depths of the soil and probably  
603 express specialized photoreceptors responsive to low illumination rates especially at the blue  
604 wavelength range (Galen *et al.*, 2007 and references therein). Differences in photoreception  
605 between aboveground and soil-residing plant parts may explain discrepancies in the cellular  
606 responses to SL or SL inhibitors and this is a matter that deserves to be followed up.

607         Although TIS108 is an inhibitor of P450 cytochrome monooxygenases and thus  
608 antagonist of SL function, previous reports have confirmed its inhibitory effect to hypocotyl  
609 elongation (Kawada *et al.*, 2019). On this basis, the follow-up effects of TIS108 on cortical  
610 microtubules organization and dynamics are in line with its observed effects on hypocotyl  
611 growth. Since the effects of TIS108 are also differentiated between light-grown and etiolated  
612 seedlings, it is likely that the TIS108-induced cytoskeletal remodelling is also associated to  
613 imbalances in SL signalling.

614         In conclusion, SL have robust effects on several aspects of plant development including  
615 size regulation and growth directionality of both the hypocotyl and the root. Moreover, SL  
616 reportedly act in concert with other environmental and intrinsic factors, exerting effects in the  
617 same aspects of plant development. In the search of cellular mechanisms underlying  
618 developmental implications of SL signalling, the present study highlights the significance of

619 cytoskeletal remodelling in the process of SL-mediated inhibition of hypocotyl growth and  
620 reveals the differential regulation of both MT organization and dynamics by SL at different  
621 illumination regimes. It is reasonable to assume that SL signalling will diversely affect the  
622 growth of different plant parts with exposure to different light conditions.

623

## 624 **Supplementary data**

625

626 Supplementary data are available at *JXB* online.

627

628 *Fig. S1.* Quantitative extent of the effect of strigolactone interference in hypocotyl  
629 elongation of light-grown Col-0 (A), etiolated Col-0 (B), light-grown *max2-1* (C), and etiolated  
630 *max2-1* (D) seedlings. \*,  $p < 0.05$ ; \*\*\*,  $p < 0.001$  according to Student's t-test.

631 *Fig. S2.* Pairwise comparison of Col-0 and *max2-1* microtubule plus end growth (A;  
632  $N \geq 33$ ; two-way ANOVA was followed with Scheffé's test, statistical comparison is shown  
633 within groups sharing the same genotype; letters in the graph are shared by groups without  
634 statistically significant differences at the 0.001 probability level; results are in Table S12) and  
635 shrinkage (B;  $N \geq 20$ ; two-way ANOVA was followed with Scheffé's test, statistical comparison  
636 is shown within groups sharing the same genotype; letters in the graph are shared by groups  
637 without statistically significant differences at the 0.001 probability level; results are in Table  
638 S13) under all experimental conditions used herein. In all box plots, average is presented by  $\times$ ,  
639 median by the middle line, 1st quartile by the bottom line, 3<sup>rd</sup> quartile by the top line; the  
640 whiskers lie within the  $1.5^{\times}$  interquartile range (defined from the 1<sup>st</sup> to the 3<sup>rd</sup> quartile) while  
641 outliers are omitted.

642 *Supplementary Movie S1.* SIM time series corresponding to Fig. 7A. Microtubule  
643 dynamics of etiolated, mock-treated Col-0 hypocotyl epidermal cells expressing the GFP-MBD  
644 marker.

645 *Supplementary Movie S2.* SIM time series corresponding to Fig. 7E. Microtubule  
646 dynamics of etiolated Col-0 hypocotyl epidermal cells expressing the GFP-MBD marker treated  
647 with 3  $\mu$ M GR24.

648 *Supplementary Movie S3.* SIM time series corresponding to Fig. 7I. Microtubule  
649 dynamics of etiolated Col-0 hypocotyl epidermal cells expressing the GFP-MBD marker treated  
650 with 25  $\mu$ M GR24.

651 *Supplementary Movie S4.* SIM time series corresponding to Fig. 7M. Microtubule  
652 dynamics of etiolated Col-0 hypocotyl epidermal cells expressing the GFP-MBD marker treated  
653 with 3  $\mu$ M TIS108.

654 *Supplementary Movie S5.* SIM time series corresponding to Fig. 8A. Microtubule  
655 dynamics of etiolated, mock-treated *max2-1* hypocotyl epidermal cells expressing the GFP-MBD  
656 marker.

657 *Supplementary Movie S6.* SIM time series corresponding to Fig. 8F. Microtubule  
658 dynamics of etiolated *max2-1* hypocotyl epidermal cells expressing the GFP-MBD marker  
659 treated with 3  $\mu$ M GR24.

660 *Supplementary Movie S7.* SIM time series corresponding to Fig. 8L. Microtubule  
661 dynamics of etiolated *max2-1* hypocotyl epidermal cells expressing the GFP-MBD marker  
662 treated with 25  $\mu$ M GR24.

663 *Supplementary Movie S8.* SIM time series corresponding to Fig. 8Q. Microtubule  
664 dynamics of etiolated *max2-1* hypocotyl epidermal cells expressing the GFP-MBD marker  
665 treated with 3  $\mu$ M TIS108.

666 *Table S1.* Statistical analysis for Fig. 1Q.

667 *Table S2.* Statistical analysis for Fig. 1R.

668 *Table S3.* Statistical analysis for Fig. 2I.

669 *Table S4.* Statistical analysis for Fig. 3Q.

670 *Table S5.* Statistical analysis for Fig. 3R.

671 *Table S6.* Statistical analysis for Fig. 4R.

672 *Table S7.* Statistical analysis for Fig. 5I.

673 *Table S8.* Statistical analysis for Fig. 5K.

674 *Table S9.* Statistical analysis for Fig. 6K.

675 *Table S10.* Statistical analysis for Fig. 7Q.

676 *Table S11.* Statistical analysis for Fig. 7R.

677 *Table S12.* Statistical analysis for Fig. S2A.

678 *Table S13.* Statistical analysis for Fig. S2B.



679

## 680 **Acknowledgments**

681

682 We gratefully acknowledge the gift of *max2-1* mutant by Prof. Hinanit Koltai (Institute of  
683 Plant Sciences ARO, Volcani Center, Bet-Dagan). We appreciate the help of Pavlína Floková in  
684 the reconstruction of some of the time series acquired by SIM. The research was supported from  
685 ERDF project "Plants as a tool for sustainable global development" (No.  
686 CZ.02.1.01/0.0/0.0/16\_019/0000827), and partially by the Višegrad Out-Going Scholarship for  
687 the Eastern Partnership for Post-Masters (independent research) for the academic year 2015–  
688 2016 (ID: 51500570).

689

## 690 **Author contributions**

691

692 YK and JŠ designed experiments with contribution from GK. YK and SH carried out all image  
693 acquisitions with the help of GK and MO. YK, SH and GK carried out all post-acquisition image  
694 processing. YK and SH carried out all hypocotyl length and width measurements. GK acquired  
695 all necessary measurements and analyzed all data related to microtubule organization and  
696 dynamics. TV carried out statistical analyses. TP synthesized GR24. YK and GK drafted the  
697 manuscript. GK compiled all figures with input from YK, TV, and JŠ. JŠ provided funding and  
698 infrastructure.

699

## 700 **Data Availability Statement**

701

702 All data supporting the findings of this study are available within the paper and within its  
703 supplementary materials published online.

704

## 705 **References**

706 **Agusti J, Herold S, Schwarz M, et al.** 2011. Strigolactone signaling is required for auxin-  
707 dependent stimulation of secondary growth in plants. *Proceedings of the National Academy of*  
708 *Sciences* **108**, 20242–20247.

- 709 **Akiyama K, Matsuzaki K, Hayashi H.** 2005. Plant sesquiterpenes induce hyphal branching in  
710 arbuscular mycorrhizal fungi. *Nature* **435**, 824–827.
- 711 **Ambrose C, Wasteneys GO.** 2014. Microtubule initiation from the nuclear surface controls  
712 cortical microtubule growth polarity and orientation in *Arabidopsis thaliana*. *Plant and Cell*  
713 *Physiology* **55**, 1636–1645.
- 714 **Bennett T, Liang Y, Seale M, Ward S, Müller D, Leyser O.** 2016. Strigolactone regulates  
715 shoot development through a core signalling pathway. *Biology Open* **5**, 1806–1820.
- 716 **Blume YB, Krasnylenko YA, Yemets AI.** 2017. The role of the plant cytoskeleton in  
717 phytohormone signaling under abiotic and biotic stresses. In: Girdhar K. Pandey, ed.  
718 *Mechanism*
- 719 **Boudaoud A, Burian A, Borowska-Wykręt D, Uyttewaal M, Wrzalik R, Kwiatkowska D,**  
720 **Hamant O.** 2014. FibrilTool, an ImageJ plug-in to quantify fibrillar structures in raw  
721 microscopy images. *Nature Protocols* **9**, 457–463.
- 722 **Brewer PB, Koltai H, Beveridge CA.** 2013. Diverse roles of strigolactones in plant  
723 development. *Molecular Plant* **6**, 18–28.
- 724 **Cook CE, Whichard LP, Turner B, Wall ME, Egley GH.** 1966. Germination of witchweed  
725 (*Striga lutea* Lour.): isolation and properties of a potent stimulant. *Science* **154**, 1189–1190.
- 726 **de Saint Germain A, Ligerot Y, Dun EA, Pillot JP, Ross JJ, Beveridge CA, Rameau C.**  
727 2013. Strigolactones stimulate internode elongation independently of gibberellins. *Plant*  
728 *Physiology* **163**, 1012–1025.
- 729 **Domagalska MA, Leyser O.** 2011. Signal integration in the control of shoot branching. *Nat Rev*  
730 *Molecular and Cellular Biology* **12**, 211–221.
- 731 **Fischer K, Schopfer P.** 1997. Separation of photolabile-phytochrome and photostable-  
732 phytochrome actions on growth and microtubule orientation in maize coleoptiles (A  
733 *Physiological Approach*). *Plant Physiology* **115**, 511–518.
- 734 **Foo E, Yoneyama K, Hugill CJ, Quittenden LJ, Reid JB.** 2013. Strigolactones and the  
735 regulation of pea symbioses in response to nitrate and phosphate deficiency. *Molecular Plant* **6**,  
736 76–87.
- 737 **Galen C, Rabenold JJ, Liscum E.** 2007. Light-sensing in roots. *Plant Signaling & Behavior* **2**,  
738 106–108.

- 739 **Gomez-Roldan V, Fermas S, Brewer PB, et al.** 2008. Strigolactone inhibition of shoot  
740 branching. *Nature* **455**, 189–94.
- 741 **Ha CV, Leyva-Gonzalez MA, Osakabe Y, et al.** 2014. Positive regulatory role of strigolactone  
742 in plant responses to drought and salt stress. *Proceedings of the National Academy of Sciences*  
743 **111**, 851–856.
- 744 **Hoffmann B, Proust H, Belcram K, et al.** 2014. Strigolactones inhibit caulonema elongation  
745 and cell division in the moss *Physcomitrella patens*. *PLOS ONE* doi:  
746 10.1371/journal.pone.0099206
- 747 **Hu Z, Yan H, Yang J, Yamaguchi S, Maekawa M, Takamure I, Tsutsumi N, Kyojuka J,**  
748 **Nakazono M.** 2010. Strigolactones negatively regulate mesocotyl elongation in rice during  
749 germination and growth in darkness. *Plant and Cell Physiology* **51**, 1136–1142.
- 750 **Ito S, Kitahata N, Umehara M, et al.** 2010. A new lead chemical for strigolactone biosynthesis  
751 inhibitors. *Plant and Cell Physiology* **51**, 1143–1150.
- 752 **Ito S, Umehara M, Hanada A, Kitahata N, Hayase H, Yamaguchi S, Asami T.** 2011. Effects  
753 of triazole derivatives on strigolactone levels and growth retardation in rice. *PLOS ONE* doi:  
754 10.1371/journal.pone.0021723
- 755 **Ito S, Umehara M, Hanada A, Yamaguchi S, Asami T.** 2013. Effects of strigolactone-  
756 biosynthesis inhibitor TIS108 on *Arabidopsis*. *Plant Signaling & Behavior* doi:  
757 10.4161/psb.24193
- 758 **Ivakov, A, Persson, S.** 2013. Plant cell shape: modulators and measurements. *Frontiers in Plant*  
759 *Science* doi: 10.3389/fpls.2013.00439.
- 760 **Jia KP, Luo Q, He SB, Lu XD, Yang HQ.** 2014. Strigolactone-regulated hypocotyl elongation  
761 is dependent on cryptochrome and phytochrome signaling pathways in *Arabidopsis*. *Molecular*  
762 *Plant* **7**, 528–540.
- 763 **Jiang L, Matthys C, Marquez-Garcia B, et al.** 2016. Strigolactones spatially influence lateral  
764 root development through the cytokinin signaling network. *The Journal of Experimental Botany*  
765 **67**, 379–389.
- 766 **Kapulnik Y, Delaux PM, Resnick N, et al.** 2011. Strigolactones affect lateral root formation  
767 and root-hair elongation in *Arabidopsis*. *Planta* **233**, 209–216.

- 768 **Kartasalo K, Pölönen RP, Ojala M, Rasku J, Lekkala J, Aalto-Setälä K, Kallio P.** 2015.  
769 CytoSpectre: a tool for spectral analysis of oriented structures on cellular and subcellular levels.  
770 BMC Bioinformatics **16**, 344.
- 771 **Kawada K, Takahashi I, Arai M, et al.** 2019. Synthesis and biological evaluation of novel  
772 triazole derivatives as strigolactone biosynthesis inhibitors. Journal of Agricultural and Food  
773 Chemistry **67**, 6143–6149.
- 774 **Khanna R, Li J, Tseng TS, Schroeder JI, Ehrhardt DW, Briggs WR.** 2014. COP1 jointly  
775 modulates cytoskeletal processes and electrophysiological responses required for stomatal  
776 closure. Molecular plant **7**, 1441–1454.
- 777 **Kohlen W, Charnikhova T, Liu Q, Bours R, Domagalska MA, Beguerie S, Verstappen F,**  
778 **Leyser O, Bouwmeester H, Ruyter-Spira C.** 2011. Strigolactones are transported through the  
779 xylem and play a key role in shoot architectural response to phosphate deficiency in non-  
780 arbuscular mycorrhizal host *Arabidopsis*. Plant Physiology **155**, 974–987.
- 781 **Koltai H.** 2014. Receptors, repressors, PINs: a playground for strigolactone signaling. Trends in  
782 Plant Science **19**, 727–733.
- 783 **Komis G, Apostolakos P, Galatis B.** 2002. Hyperosmotic stress-induced actin filament  
784 reorganization in leaf cells of *Chlorophyton comosum*. The Journal of Experimental Botany **53**,  
785 1699–1710.
- 786 **Komis G, Mistrik M, Šamajová O, Doskočilová A, Ovečka M, Illés P, Bartek J, Šamaj J.**  
787 2014. Dynamics and organization of cortical microtubules as revealed by superresolution  
788 structured illumination microscopy. Plant Physiology **165**, 129–148.
- 789 **Komis G, Mistrik M, Šamajová O, Ovečka M, Bartek J, Šamaj J.** 2015. Superresolution live  
790 imaging of plant cells using structured illumination microscopy. Nature Protocols **10**, 1248–63.
- 791 **Koren D, Resnick N, Gati EM, Belausov E, Weininger S, Kapulnik Y, Koltai H.** 2013.  
792 Strigolactone signaling in the endodermis is sufficient to restore root responses and involves  
793 SHORT HYPOCOTYL 2 (SHY2) activity. New Phytologist **198**, 866–874.
- 794 **Kumar M, Pandya-Kumar N, Kapulnik Y, Koltai H.** 2015a. Strigolactone signaling in root  
795 development and phosphate starvation. Plant Signaling & Behavior doi:  
796 10.1080/15592324.2015.1045174

- 797 **Kumar M, Pandya-Kumar N, Dam A, et al.** 2015b. *Arabidopsis* response to low-phosphate  
798 conditions includes active changes in actin filaments and PIN2 polarization and is dependent on  
799 strigolactone signalling. *The Journal of Experimental Botany* **66**, 1499–1510.
- 800 **Li W, Nguyen KH, Watanabe Y, Yamaguchi S, Tran LS.** 2016. OaMAX2 of *Orobancha*  
801 *aegyptiaca* and *Arabidopsis* AtMAX2 share conserved functions in both development and  
802 drought responses. *Biochemical and Biophysical Research Communications* **478**, 521–526.
- 803 **Lian N, Liu X, Wang X, Zhou Y, Li H, Li J, Mao T.** 2017. COP1 mediates dark-specific  
804 degradation of microtubule-associated protein WDL3 in regulating *Arabidopsis* hypocotyl  
805 elongation. *Proceedings of the National Academy of Sciences* **114**, 12321–12326.
- 806 **Lindeboom JJ, Nakamura M, Hibbel A, Shundyak K, Gutierrez R, Ketelaar T, Emons**  
807 **AM, Mulder BM, Kirik V, Ehrhardt DW.** 2013. A mechanism for reorientation of cortical  
808 microtubule arrays driven by microtubule severing. *Science* **342**, 1245533.
- 809 **Liu H.** 2015. Comparing Welch's ANOVA, a Kruskal-Wallis test and traditional ANOVA in  
810 case of Heterogeneity of Variance. [http://](http://https://scholarscompass.vcu.edu/cgi/viewcontent.cgi?article=5026&context=etd)  
811 <https://scholarscompass.vcu.edu/cgi/viewcontent.cgi?article=5026&context=etd>. Accessed May  
812 2020.
- 813 **Liu Q, Zhang Y, Matusova R, Charnikhova T, et al.** 2014. *Striga hermonthica* MAX2  
814 restores branching but not the very low fluence response in the *Arabidopsis thaliana max2*  
815 mutant. *New Phytologist* **202**, 531–541.
- 816 **Liu X, Qin T, Ma Q, Sun J, Liu Z, Yuan M, Mao T.** 2013. Light-regulated hypocotyl  
817 elongation involves proteasome-dependent degradation of the microtubule regulatory protein  
818 WDL3 in *Arabidopsis* *The Plant Cell* **25**, 1740–1755.
- 819 **Locascio A, Blázquez MA, Alabadí D.** 2013. Dynamic regulation of cortical microtubule  
820 organization through prefoldin-DELLA interaction. *Current Biology* **23**, 804–809.
- 821 **Lopez-Obando M, de Villiers R, Hoffmann B, et al.** 2018. *Physcomitrella patens* MAX2  
822 characterization suggests an ancient role for this F-box protein in photomorphogenesis rather  
823 than strigolactone signalling. *New Phytologist* **219**, 743–756.
- 824 **Louveaux M, Rochette S, Beauzamy L, Boudaoud A, Hamant O.** 2016. The impact of  
825 mechanical compression on cortical microtubules in *Arabidopsis*: a quantitative pipeline. *The*  
826 *Plant Journal* **88**, 328–342.

827 **Ma Q, Wang X, Sun J, Mao T.** 2018. Coordinated regulation of hypocotyl cell elongation by  
828 light and ethylene through a microtubule destabilizing protein. *Plant Physiology* **176**, 678–690.

829 **Marc J, Granger CL, Brincat J, Fisher DD, Kao Th, McCubbin AG, Cyr RJ.** 1998. A GFP-  
830 MAP4 reporter gene for visualizing cortical microtubule rearrangements in living epidermal  
831 cells. *The Plant Cell* **10**, 1927–1940.

832 **Mayzlish-Gati E, Laufer D, Grivas CF, et al.** 2015. Strigolactone analogs act as new anti-  
833 cancer agents in inhibition of breast cancer in xenograft model. *Cancer Biology & Therapy* **16**,  
834 1682–1688.

835 **Pandya □ Kumar N, Shema R, Kumar M, et al.** 2014. Strigolactone analog GR24 triggers  
836 changes in PIN2 polarity, vesicle trafficking and actin filament architecture. *New Phytologist*  
837 **202**, 1184–1196.

838 **Podolec R, Ulm R.** 2018. Photoreceptor-mediated regulation of the COP1/SPA E3 ubiquitin  
839 ligase. *Current Opinion in Plant Biology* **45**, 18–25.

840 **Pollock CB, McDonough S, Wang VS, et al.** 2014. Strigolactone analogues induce apoptosis  
841 through activation of p38 and the stress response pathway in cancer cell lines and in  
842 conditionally reprogramed primary prostate cancer cells. *Oncotarget* **5**, 1683–1698.

843 **Roumeliotis E, Kloosterman B, Oortwijn M, Kohlen W, Bouwmeester HJ, Visser RGF,**  
844 **Bachem CWB.** 2012. The effects of auxin and strigolactones on tuber initiation and stolon  
845 architecture in potato. *The Journal of Experimental Botany* **63**, 4539–4547.

846 **Ruan Y, Wasteneys GO.** 2014. CLASP: a microtubule-based integrator of the hormone-  
847 mediated transitions from cell division to elongation. *Current Opinion in Plant Biology* **22**, 149–  
848 158.

849 **Ruyter-Spira C, Kohlen W, Charnikhova T, et al.** 2011. Physiological effects of the synthetic  
850 strigolactone analog GR24 on root system architecture in *Arabidopsis*: another belowground role  
851 for strigolactones? *Plant Physiology* **155**, 721–34.

852 **Sambade A, Pratap A, Buschmann H, Morris RJ, Lloyd C.** 2012. The influence of light on  
853 microtubule dynamics and alignment in the *Arabidopsis* hypocotyl. *Plant Cell* **24**, 192–201.

854 **Sampathkumar A, Krupinski P, Wightman R, Milani P, Berquand A, Boudaoud A,**  
855 **Hamant O, Jönsson H, Meyerowitz E.M.** 2014. Subcellular and supracellular mechanical  
856 stress prescribes cytoskeleton behavior in *Arabidopsis* cotyledon pavement cells. eLife doi:  
857 10.7554/eLife.01967

- 858 **Schneider CA, Rasband WS, Eliceiri KW.** 2012. NIH Image to ImageJ: 25 years of image  
859 analysis. *Nature Methods* **9**, 671–675.
- 860 **Seto Y, Yasui R, Kameoka H. et al.** 2019. Strigolactone perception and deactivation by a  
861 hydrolase receptor DWARF14. *Nature Communications* **10**, 191.
- 862 **Shaw SL, Kamyar R, Ehrhardt DW.** 2003. Sustained microtubule treadmilling in *Arabidopsis*  
863 cortical arrays. *Science* **300**, 1715–1718.
- 864 **Shinohara N, Taylor C, Leyser O.** 2013. Strigolactone can promote or inhibit shoot branching  
865 by triggering rapid depletion of the auxin efflux protein PIN1 from the plasma membrane. *PLOS*  
866 *Biology* doi: 10.1371/journal.pbio.1001474
- 867 **Shoji T, Suzuki K, Abe T, Kaneko Y, Shi H, Zhu JK, Rus A, Hasegawa PM, Hashimoto T.**  
868 2006. Salt stress affects cortical microtubule organization and helical growth in *Arabidopsis*.  
869 *Plant and Cell Physiology* **47**, 158–1168.
- 870 **Soto MJ, Fernández-Aparicio M, Castellanos-Morales V, García-Garrido JM, Ocampo JA,**  
871 **Delgado MJ, Vierheilig H.** 2009. First indications for the involvement of strigolactones on  
872 nodule formation in alfalfa (*Medicago sativa*). *Soil Biology and Biochemistry* **42**, 383–385.
- 873 **Stirnberg P, van de Sande K, Leyser HMO.** 2002. MAX1 and MAX2 control shoot lateral  
874 branching in *Arabidopsis*. *Development* **129**, 1131–1141.
- 875 **Sun H, Xu F, Guo X, et al.** 2019. A strigolactone signal inhibits secondary lateral root  
876 development in rice. *Frontiers in Plant Science* doi: 10.3389/fpls.2019.01527
- 877 **Takatani S, Verger S, Okamoto T, Takahashi T, Hamant O, Motose H.** 2020. Microtubule  
878 response to tensile stress is curbed by NEK6 to buffer growth variation in the *Arabidopsis*  
879 hypocotyl. *Current Biology* **30**, 1491–1503.
- 880 **True JH, Shaw SL.** 2020. Exogenous auxin induces transverse microtubule arrays through  
881 TRANSPORT INHIBITOR RESPONSE1/AUXIN SIGNALING F-BOX receptors. *Plant*  
882 *Physiology* **182**, 892–907.
- 883 **Tsuchiya Y, Vidaurre D, Toh S, Hanada A, Nambara E, Kamiya Y, Yamaguchi S,**  
884 **McCourt P.** 2010. A small-molecule screen identifies new functions for the plant hormone  
885 strigolactone. *Nature Chemical Biology* **6**, 741–749.
- 886 **Umehara M, Hanada A, Yoshida S, et al.** 2008. Inhibition of shoot branching by new terpenoid  
887 plant hormones. *Nature* **455**, 195–200.

- 888 **Vineyard L, Elliott A, Dhingra S, Lucas JR, Shaw SL.** 2013. Progressive transverse  
889 microtubule array organization in hormone-induced *Arabidopsis* hypocotyl cells. *Plant Cell* **25**,  
890 662–676.
- 891 **Wang B.** 2020. Strigolactone and karrikin signaling pathways elicit ubiquitination and  
892 proteolysis of SMXL2 to regulate hypocotyl elongation in *Arabidopsis thaliana*. *Plant Cell* **32**,  
893 2251–2270.
- 894 **Wang C, Zhang L, Yuan M, Ge Y, Liu Y, Fan J, Ruan Y, Cui Z, Tong S, Zhang S.** 2010.  
895 The microfilament cytoskeleton plays a vital role in salt and osmotic stress tolerance in  
896 *Arabidopsis*. *Plant Biology* **12**, 70–78.
- 897 **Wang L, Wang B, Jiang L, Liu X, Li X, Lu Z, Meng X, Wang Y, Smith SM, Li J.** 2015.  
898 Strigolactone signaling in *Arabidopsis* regulates shoot development by targeting d53-like SMXL  
899 repressor proteins for ubiquitination and degradation. *Plant Cell* **27**, 3128–3142.
- 900 **Wang L, Xu Q, Yu H, Ma H, Li X, Yang J, Chu J, Xie Q, Wang Y, Smith SM, Li J, Xiong**  
901 **G,**
- 902 **Wang X, Ma Q, Wang R, Wang P, Liu Y, Mao T.** 2020. Submergence stress-induced  
903 hypocotyl elongation through ethylene signaling-mediated regulation of cortical microtubules in  
904 *Arabidopsis*, *Journal of Experimental Botany* **71**, 1067–1077.
- 905 **Wang X, Zhang J, Yuan M, Ehrhardt DW, Wang Z, Mao T.** 2012. *Arabidopsis* microtubule  
906 destabilizing protein40 is involved in brassinosteroid regulation of hypocotyl elongation. *The*  
907 *Plant Cell* **24**, 4012–4025.
- 908 **Wang Y, Sun S, Zhu W, Jia K, Yang H, Wang X.** 2013. Strigolactone/MAX2-induced  
909 degradation of brassinosteroid transcriptional effector BES1 regulates shoot branching.  
910 *Developmental Cell* **27**, 681–688.
- 911 **Yoneyama K.** 2020. Recent progress in the chemistry and biochemistry of strigolactones.  
912 *Journal of Pesticide Science* doi: 10.1584/jpestics.
- 913 **Yoneyama K, Xie X, Kusumoto,D, Sekimoto H, Sugimoto Y, Takeuchi Y, Yoneyama K.**  
914 2007. Nitrogen deficiency as well as phosphorus deficiency in sorghum promotes the production  
915 and exudation of 5-deoxystrigol, the host recognition signal for arbuscular mycorrhizal fungi and  
916 root parasites. *Planta* **227**, 125–132.



917 **Zandomeni K., Schopfer P.** 1993. Reorientation of microtubules at the outer epidermal wall of  
918 maize coleoptiles by phytochrome, blue-light photoreceptor, and auxin. *Protoplasma* **173**, 103–  
919 112.

920 **Zwanenburg B, Nayak SK, Charnikhova TV, Bouwmeester HJ.** 2013. New strigolactone  
921 mimics: structure-activity relationship and mode of action as germinating stimulants for parasitic  
922 weeds. *Bioorganic & Medicinal Chemistry Letters* **23**, 5182–5186.

923

## 924 **Figure legends**

925

926 **Fig. 1. Hypocotyl development of light-grown seedlings of Arabidopsis Col-0 or the *max2-1***  
927 **mutant in the presence or absence of GR24 synthetic strigolactone (3 and 25  $\mu$ M) or the**  
928 **biosynthetic inhibitor of strigolactone production TIS108 (3  $\mu$ M). (A–D).** Overview of  
929 hypocotyl of Col-0 seedlings treated with solvent alone (mock; A); 3  $\mu$ M GR24 (B); 25  $\mu$ M  
930 GR24 (C); 3  $\mu$ M TIS108 (D). (E–H) Similar overview of hypocotyls of light-grown *max2-1*  
931 mutant seedlings in the presence of solvent alone (mock; E), 3  $\mu$ M GR24 (F); 25  $\mu$ M GR24 (G);  
932 3  $\mu$ M TIS108 (H). (I–L) Magnified views of hypocotyls of Col-0 treated with solvent alone  
933 (mock; I); 3  $\mu$ M GR24 (J); 25  $\mu$ M GR24 (K); 3  $\mu$ M TIS108 (L) showing mild cell swelling in all  
934 treatments (J–L) compared to control (I). (M–P) Similar comparison of *max2-1* hypocotyl  
935 epidermal cells treated with solvent alone (mock; M); 3  $\mu$ M GR24 (N); 25  $\mu$ M GR24 (O); 3  $\mu$ M  
936 TIS108 (P). (Q) Quantitative assessment of Col-0 and *max2-1* hypocotyl length comparing  
937 pairwise mock treatment and treatments with 3  $\mu$ M GR24, 25  $\mu$ M GR24, and 3  $\mu$ M TIS108  
938 ( $N \geq 59$ ; two-way ANOVA was followed with Scheffé's test, statistical comparison is shown  
939 within groups sharing the same genotype; letters in the graph are shared by groups without  
940 statistically significant differences at the 0.001 probability level; results are in Table S1). (R)  
941 Quantitative assessment of Col-0 and *max2-1* hypocotyl width comparing pairwise mock  
942 treatment and treatments with 3  $\mu$ M GR24, 25  $\mu$ M GR24 and 3  $\mu$ M TIS108 ( $N \geq 27$ ; two-way  
943 ANOVA was followed with Scheffé's test, statistical comparison is shown within groups sharing  
944 the same genotype; letters in the graph are shared by groups without statistically significant  
945 differences at the 0.001 probability level; results are in Table S2). In all box plots, average is  
946 presented by  $\times$ , median by the middle line, 1st quartile by the bottom line, 3<sup>rd</sup> quartile by the top

947 line; the whiskers lie within the 1.5× interquartile range (defined from the 1<sup>st</sup> to the 3<sup>rd</sup> quartile)  
948 while outliers are omitted. Scale bars: 5 mm (A–H); 5 μm (I–P).

949  
950 **Fig. 2. Hypocotyl development of dark-grown seedlings of Arabidopsis Col-0 or the *max2-1***  
951 **mutant in the presence or absence of GR24 synthetic strigolactone (3 μM and 25 μM) or**  
952 **the biosynthetic inhibitor of strigolactone production TIS108 (3 μM). (A–E).** Overview of  
953 etiolated hypocotyl of Col-0 seedlings treated with solvent alone (mock; A); 3 μM GR24 (B); 25  
954 μM GR24 (C); 3 μM TIS108 (D). (E–H) Similar overview of hypocotyls of etiolated *max2-1*  
955 mutant seedlings in the presence of solvent alone (mock; E); 3 μM GR24 (F); 25 μM GR24 (G);  
956 3 μM of TIS108 (H). (I) Quantitative assessment of etiolated Col-0 and *max2-1* hypocotyl length  
957 comparing pairwise mock treatment and treatments with 3 μM GR24, 25 μM GR24, and 3 μM  
958 TIS108 (N≥22; two-way ANOVA was followed with Scheffé's test, statistical comparison is  
959 shown within groups sharing the same genotype; letters in the graph are shared by groups  
960 without statistically significant differences at the 0.001 probability level; results are in Table S3).  
961 In all box plots, average is presented by ×, median by the middle line, 1<sup>st</sup> quartile by the bottom  
962 line, 3<sup>rd</sup> quartile by the top line; the whiskers lie within the 1.5× interquartile range (defined from  
963 the 1<sup>st</sup> to the 3<sup>rd</sup> quartiles) while outliers are omitted. Scale bars: 10 mm (A–H).

964  
965 **Fig. 3. Assessment of microtubule organization in epidermal hypocotyl cells of light-grown**  
966 **seedlings of Arabidopsis Col-0 or the *max2-1* mutant in the presence or absence of GR24**  
967 **synthetic strigolactone (3 and 25 μM) or the biosynthetic inhibitor of strigolactone**  
968 **production TIS108 (3 μM). (A–D).** Overview of hypocotyl of Col-0 seedlings treated with  
969 solvent alone (mock; A), 3 μM GR24 (B); 25 μM GR24 (C); 3 μM TIS108 (D). (E–H)  
970 Cytospectre graphs of cortical microtubule distribution where (E) corresponds to (A), (F) to (B),  
971 (G) to (C), and (H) to (D). (I–L) Overview of hypocotyl of *max2-1* seedlings treated with solvent  
972 alone (mock; I); 3 μM GR24 (J); 25 μM GR24 (K); 3 μM TIS108 (L). (M–P) Cytospectre graphs  
973 of cortical microtubule distribution where (M) corresponds to (I), (N) to (J), (O) to (K), and (P)  
974 to (L). (Q) Quantitative assessment of anisotropy of cortical microtubule organization in light-  
975 grown Col-0 after mock treatment and treatments with 3 μM GR24; 25 μM GR24 and 3 μM  
976 TIS108 (N≥54; Welch's ANOVA was followed with Scheffé's test, statistical comparison is  
977 shown within groups sharing the same genotype; letters in the graph are shared by groups

978 without statistically significant differences at the 0.01 probability level; results are in Table S4).  
979 (R) Quantitative assessment of anisotropy of cortical microtubule organization in light-grown  
980 *max2-1* after mock treatment and treatments with 3  $\mu$ M GR24, 25  $\mu$ M GR24, and 3  $\mu$ M TIS108  
981 ( $N \geq 31$ ; Welch's ANOVA was followed with Scheffé's test, statistical comparison is shown  
982 within groups sharing the same genotype; letters in the graph are shared by groups without  
983 statistically significant differences at the 0.01 probability level; results are in Table S5). In all  
984 box plots, average is presented by  $\times$ , median by the middle line, 1st quartile by the bottom line,  
985 3<sup>rd</sup> quartile by the top line; the whiskers lie within the 1.5 $\times$  interquartile range (defined from the  
986 1<sup>st</sup> to the 3<sup>rd</sup> quartile) while outliers are omitted. Scale bars: 20  $\mu$ m.

987 **Fig. 4. Assessment of microtubule organization in epidermal hypocotyl cells of etiolated**  
988 **seedlings of *Arabidopsis* Col-0 or the *max2-1* mutant in the presence or absence of GR24**  
989 **synthetic strigolactone (3 and 25  $\mu$ M) or the biosynthetic inhibitor of strigolactone**  
990 **production TIS108 (3  $\mu$ M). (A-D). Overview of hypocotyl of Col-0 seedlings treated with**  
991 **solvent alone (mock; A); 3  $\mu$ M GR24 (B); 25  $\mu$ M GR24 (C); 3  $\mu$ M TIS108 (D). (E-H)**  
992 **Cytospectre graphs of cortical microtubule distribution where (E) corresponds to (A), (F) to (B),**  
993 **(G) to (C), and (H) to (D). (I-L) Overview of hypocotyl of *max2-1* seedlings treated with solvent**  
994 **alone (mock; I); 3  $\mu$ M GR24 (J); 25  $\mu$ M GR24 (K); 3  $\mu$ M TIS108 (L). (M-P) Cytospectre graphs**  
995 **of cortical microtubule distribution where (M) corresponds to (I), (N) to (J), (O) to (K), and (P)**  
996 **to (L). (Q) Quantitative assessment of anisotropy of cortical microtubule organization in light-**  
997 **grown Col-0 after mock treatment and treatments with 3  $\mu$ M GR24, 25  $\mu$ M GR24 and 3  $\mu$ M**  
998 **TIS108 ( $N \geq 27$ ; Welch's ANOVA showed no statistically significant difference within the**  
999 **dataset;  $F(3, 143) = 3.1416$ ,  $p = 0.030$ ; Supplementary Table S4). (R). Quantitative assessment of**  
1000 **anisotropy of cortical microtubule organization in light-grown *max2-1* after mock treatment and**  
1001 **treatments with 3  $\mu$ M GR24, 25  $\mu$ M GR24 and 3  $\mu$ M TIS108 ( $N \geq 29$ ; Welch's ANOVA was**  
1002 **followed with Scheffé's test, but there was no statistically significant difference at the 0.01**  
1003 **probability level; results are in Table S6). In all box plots, average is presented by  $\times$ , median by**  
1004 **the middle line, 1st quartile by the bottom line, 3<sup>rd</sup> quartile by the top line; the whiskers lie within**  
1005 **the 1.5 $\times$  interquartile range (defined from the 1<sup>st</sup> to the 3<sup>rd</sup> quartile) while outliers are omitted.**  
1006 **Scale bars: 20  $\mu$ m.**

1007 **Fig. 5. Skewness of fluorescence distribution of GFP-MBD-labelled microtubules of light-**  
1008 **grown Arabidopsis Col-0 and *max2-1* epidermal hypocotyl cells in the presence or absence**  
1009 **of GR24 synthetic strigolactone (3 and 25  $\mu$ M) or the biosynthetic inhibitor of strigolactone**  
1010 **production TIS108 (3  $\mu$ M). (A-D) Overviews of hypocotyl of Col-0 seedlings treated with**  
1011 **solvent alone (mock; A); 3  $\mu$ M GR24 (B); 25  $\mu$ M GR24 (C); 3  $\mu$ M TIS108 (D). (E-H) Overview**  
1012 **of hypocotyl of *max2-1* seedlings treated with solvent alone (mock; E); 3  $\mu$ M GR24 (F); 25  $\mu$ M**  
1013 **GR24 (G); 3  $\mu$ M TIS108 (H). (I, J) Quantitative assessment of fluorescence distribution**  
1014 **skewness, comparing Col-0 (I;  $N \geq 17$ ; Welch's ANOVA was followed with Scheffé's test,**  
1015 **statistical comparison is shown within groups sharing the same genotype; letters in the graph are**  
1016 **shared by groups without statistically significant differences at the 0.01 probability level; results**  
1017 **are in Table S7) and *max2-1* (J;  $N \geq 34$ ; Welch's ANOVA showed no statistically significant**  
1018 **difference within the dataset;  $F(3, 161) = 0.0777$ ,  $p = 0.9719$ ). (K) Collective quantification of**  
1019 **fluorescence skewness comparing Col-0 and *max2-1* in a pairwise manner in all experimental**  
1020 **conditions ( $N \geq 17$ ; two-way ANOVA was followed with Scheffé's test, statistical comparison is**  
1021 **shown within groups sharing the same genotype; letters in the graph are shared by groups**  
1022 **without statistically significant differences at the 0.001 probability level; results are in Table S8).**  
1023 **In all box plots, average is presented by  $\times$ , median by the middle line, 1<sup>st</sup> quartile by the bottom**  
1024 **line, 3<sup>rd</sup> quartile by the top line; the whiskers lie within the 1.5 $\times$  interquartile range (defined from**  
1025 **the 1<sup>st</sup> to the 3<sup>rd</sup> quartiles) while outliers are omitted. Scale bars: 20  $\mu$ m.**

1026  
1027 **Fig. 6. Skewness of fluorescence distribution of GFP-MBD-labelled microtubules of**  
1028 **etiolated Arabidopsis Col-0 and *max2-1* epidermal hypocotyl cells in the presence or**  
1029 **absence of GR24 synthetic strigolactone (3 and 25  $\mu$ M) or the biosynthetic inhibitor of**  
1030 **strigolactone production TIS108 (3  $\mu$ M). (A-D) Overviews of hypocotyl of Col-0 seedlings**  
1031 **treated with solvent alone (mock; A); 3  $\mu$ M GR24 (B); 25  $\mu$ M GR24 (C); 3  $\mu$ M TIS108 (D). (E-**  
1032 **H) Overview of hypocotyl of *max2-1* seedlings treated with solvent alone (mock; E); 3  $\mu$ M**  
1033 **GR24 (F); 25  $\mu$ M GR24 (G); 3  $\mu$ M TIS108 (H). (I, J) Quantitative assessment of fluorescence**  
1034 **distribution skewness comparing Col-0 (I;  $N \geq 22$ ; Welch's ANOVA showed no statistically**  
1035 **significant difference within the dataset;  $F(3, 161) = 0.4564$ ,  $p = 0.7138$ ) and *max2-1* (J;  $N \geq 31$ ;**  
1036 **Welch's ANOVA showed no statistically significant difference within the dataset;  $F(3,$   
1037 **151) = 0.0161,  $p = 0.9972$ ). (K) Collective quantification of fluorescence skewness comparing Col-****

1038 0 and *max2-1* in a pairwise manner in all experimental conditions ( $N \geq 22$ ; two-way ANOVA was  
1039 followed with Scheffé's test, but there was no statistically significant difference at the 0.001  
1040 probability level; results are in Table S9). In all box plots, average is presented by  $\times$ , median by  
1041 the middle line, 1st quartile by the bottom line, 3<sup>rd</sup> quartile by the top line; the whiskers lie within  
1042 the  $1.5 \times$  interquartile range (defined from the 1<sup>st</sup> to the 3<sup>rd</sup> quartile) while outliers are omitted.  
1043 Scale bars: 20  $\mu\text{m}$ .

1044  
1045 **Fig. 7. Analysis of microtubule dynamics of Arabidopsis Col-0 expressing the GFP-MBD**  
1046 **microtubule marker in the presence or absence of GR24 synthetic strigolactone (3  $\mu\text{M}$  and**  
1047 **25  $\mu\text{M}$ ) or the biosynthetic inhibitor of strigolactone production TIS108 (3  $\mu\text{M}$ ). (A, B)**  
1048 Overview (A) and color-coded projection (B) of the time series corresponding to mock-treated  
1049 Col-0 (see Supplementary Movie 1). (C, D) Two kymographs showing length fluctuations of the  
1050 left (C) and the right (D) boxed areas of (A, B). (E, F) Overview (E) and color-coded projection  
1051 (F) of the time series corresponding to Col-0 treated with 3  $\mu\text{M}$  GR24 (Supplementary Movie 2).  
1052 (G, H) Two representative kymographs from boxed areas 1 and 2 of (E, F) showing decelerated  
1053 and sustainable growth and shrinkage. (I, J) Overview (I) and color-coded projection (J) of the  
1054 time series corresponding to Col-0 treated with 25  $\mu\text{M}$  GR24 (Supplementary Movie 3). (K, L)  
1055 Two representative kymographs from boxed areas 1 and 2 of (I, J) showing prolonged growth  
1056 and shrinkage at lower rates compared to mock-treated cells. (M, N) Overview (M) and color-  
1057 coded projection (N) of the time series corresponding to Col-0 treated with 3  $\mu\text{M}$  TIS108  
1058 (Supplementary Movie 4). (O, P) Two representative kymographs from boxed areas 1 and 2 of  
1059 (M, N) showing prolonged growth and shrinkage at lower rates compared to mock-treated cells.  
1060 (Q, R) Quantitative assessment of microtubule growth (Q;  $N \geq 33$ ; Welch's ANOVA was followed  
1061 with Scheffé's test, statistical comparison is shown within groups sharing the same genotype;  
1062 letters in the graph are shared by groups without statistically significant differences at the 0.01  
1063 probability level; results are in Table S10) and shrinkage (R;  $N \geq 28$ ; Welch's ANOVA was  
1064 followed with Scheffé's test, statistical comparison is shown within groups sharing the same  
1065 genotype; letters in the graph are shared by groups without statistically significant differences at  
1066 the 0.01 probability level; results are in Table S11) of Col-0 GFP-MBD labeled microtubule in  
1067 all experimental conditions. In all box plots, average is presented by  $\times$ , median by the middle  
1068 line, 1st quartile by the bottom line, 3rd quartile by the top line; the whiskers lie within the  $1.5 \times$

1069 interquartile range (defined from the 1<sup>st</sup> to the 3<sup>rd</sup> quartile) while outliers are omitted. Scale bars:  
1070 10  $\mu\text{m}$  (A, B, E, F, I, J, M, N); 5  $\mu\text{m}$  (C, D, G, H, K, L, O, P). All time bars correspond to 2 min.

1071  
1072 **Fig. 8. Analysis of microtubule dynamics of *Arabidopsis max2-1* mutant expressing the**  
1073 **GFP-MBD microtubule marker in the presence or absence of GR24 synthetic strigolactone**  
1074 **(3 and 25  $\mu\text{M}$ ) or the biosynthetic inhibitor of strigolactone production TIS108 (3  $\mu\text{M}$ ).** (A,  
1075 B) Overview (A) and color-coded projection (B) of the time series corresponding to mock-  
1076 treated *max2-1* (Supplementary Movie 5). (C, D, E) Three kymographs showing microtubule  
1077 length fluctuations corresponding to boxed areas 1,2,3 of (A, B), indicative of slower and  
1078 prolonged growth and shrinkage compared to Col-0. (F, G) Overview (F) and color-coded  
1079 projection (G) of the time series corresponding to *max2-1* treated with 3  $\mu\text{M}$  GR24  
1080 (Supplementary Movie 6). (H–K) Four representative kymographs from boxed areas 1,2,3 and 4  
1081 of (F, G) showing similar microtubule dynamics as in mock-treated cells. (L, M) Overview (L)  
1082 and color-coded projection (M) of the time series corresponding to *max2-1* treated with 25  $\mu\text{M}$   
1083 GR24 (Supplementary Movie 7). (N–P) Three representative kymographs from boxed areas 1,2  
1084 and 3 of (L, M) showing comparable growth and shrinkage to mock-treated cells. (Q, R)  
1085 Overview (Q) and color-coded projection (R) of the time series corresponding to *max2-1* treated  
1086 with 3  $\mu\text{M}$  TIS108 (Supplementary Movie 8). (S–U) Three representative kymographs from  
1087 boxed areas 1,2 and 3 of (Q, R). (V,W) Quantitative assessment of microtubule growth (Q;  
1088  $N \geq 41$ ; Welch's ANOVA showed no statistically significant difference within the dataset;  $F(3,$   
1089  $601) = 0.6081$ ,  $p = 0.6106$ ) and shrinkage (R;  $N \geq 20$ ; Welch's ANOVA showed no statistically  
1090 significant difference within the dataset;  $F(3, 333) = 80.2659$ ,  $p = 0.6649$ ) of GFP-MBD labelled  
1091 microtubule in all experimental conditions. In all box plots, average is presented by  $\times$ , median by  
1092 the middle line, 1st quartile by the bottom line, 3<sup>rd</sup> quartile by the top line; the whiskers lie within  
1093 the  $1.5 \times$  interquartile range (defined from the 1<sup>st</sup> to the 3<sup>rd</sup> quartiles) while outliers are omitted.  
1094 Scale bars: 10  $\mu\text{m}$  (A, B, F, G, L, M, Q, R); 5  $\mu\text{m}$  (H–K, N–P, S–U); 2  $\mu\text{m}$  (C–E). All time bars  
1095 correspond to 2 min.

1096  
1097 **Fig. 9. Hypothetical model of light-dependent strigolactone effects on microtubules in**  
1098 ***Arabidopsis*.** (A) Red and blue light is perceived by PHYTOCHROMES A and B (PHYA/B)  
1099 and CRYPTOCHROMES 1 and 2 (CRY1/2), respectively, which inhibit the E3 ligase complex

1100 consisting of CONSTITUTIVE PHOTOMORPHOGENIC 1 (COP1), CULLIN4 (CUL4) and  
1101 DAMAGE-BINDING PROTEIN 1 (DDB1). This E3 ligase complex directs the transfer of  
1102 ubiquitin (U) from an E2 ligase onto targets, which generally leads to their degradation by  
1103 proteasomes. Bellow the complex, known (solid line) and putative (dotted line) targets are  
1104 shown, specifically TUBULIN (TUB), KATANIN 60 (KAT60) and WAVE-DAMPENED 2-  
1105 LIKE 3 (WDL3). The function of this E3 ligase complex is more prominent under darkness,  
1106 when it is not inhibited by PHYA/B and CRY1/2. It has been previously proposed that COP1  
1107 might be regulated by the SKP1-CULLIN-F-BOX (SCF) complex containing an F-box protein  
1108 MORE AUXILARY GROWTH 2 (MAX2). This SCF complex consists of MAX2, hydrophobic  
1109 scaffold protein CULLIN1 (CUL1), S-phase kinase-associated protein 1 (SKP1), and E3  
1110 ubiquitin-protein ligase RING-BOX1 (RBX1), it also functions as an E3 ligase, known (solid  
1111 line) and putative (dotted line) targets are shown, namely SUPPRESSOR OF MORE  
1112 AXILLARY GROWTH2-LIKE (SMLX) proteins and transcriptional repressor  
1113 BRASSINAZOLE-RESISTANT 1 (BZR1), which is involved in regulation of microtubules via  
1114 the MICROTUBULE DESTABILIZING PROTEIN40 (MDP40). SCF complex is activated by  
1115 artificial strigolactones GR24+ binding to an  $\alpha/\beta$ -hydrolase D14, strigolactone-specific receptor.  
1116 (B) In light-grown seedlings the treatment with GR24, or an inhibitor of strigolactone  
1117 biosynthesis (TIS108) leads to changes in microtubule organisation and dynamics: (1) more  
1118 pronounced randomization of cortical microtubule array; (2) increased microtubule bundling and  
1119 stabilization; (3) reduced microtubule dynamicity and likely promoted microtubule longevity. On  
1120 the other hand, no significant microtubule changes were noted after similar treatments in  
1121 etiolated seedlings as the trend is to maintain highly organized systems of parallel microtubules.  
1122 (C) Regarding the overall hypocotyl phenotype, the strigolactone treatment inhibits hypocotyl  
1123 growth and cause slight radial swelling of epidermal cells in light-grown seedlings; however, the  
1124 dark-grown ones were more resistant to the changes of strigolactone content.

1125  
1126 **Conflict of Interest Statement:** The authors declare that the research was conducted in the  
1127 absence of any commercial or financial relationships that could be construed as a potential  
1128 conflict of interest.

1129

Figure 1

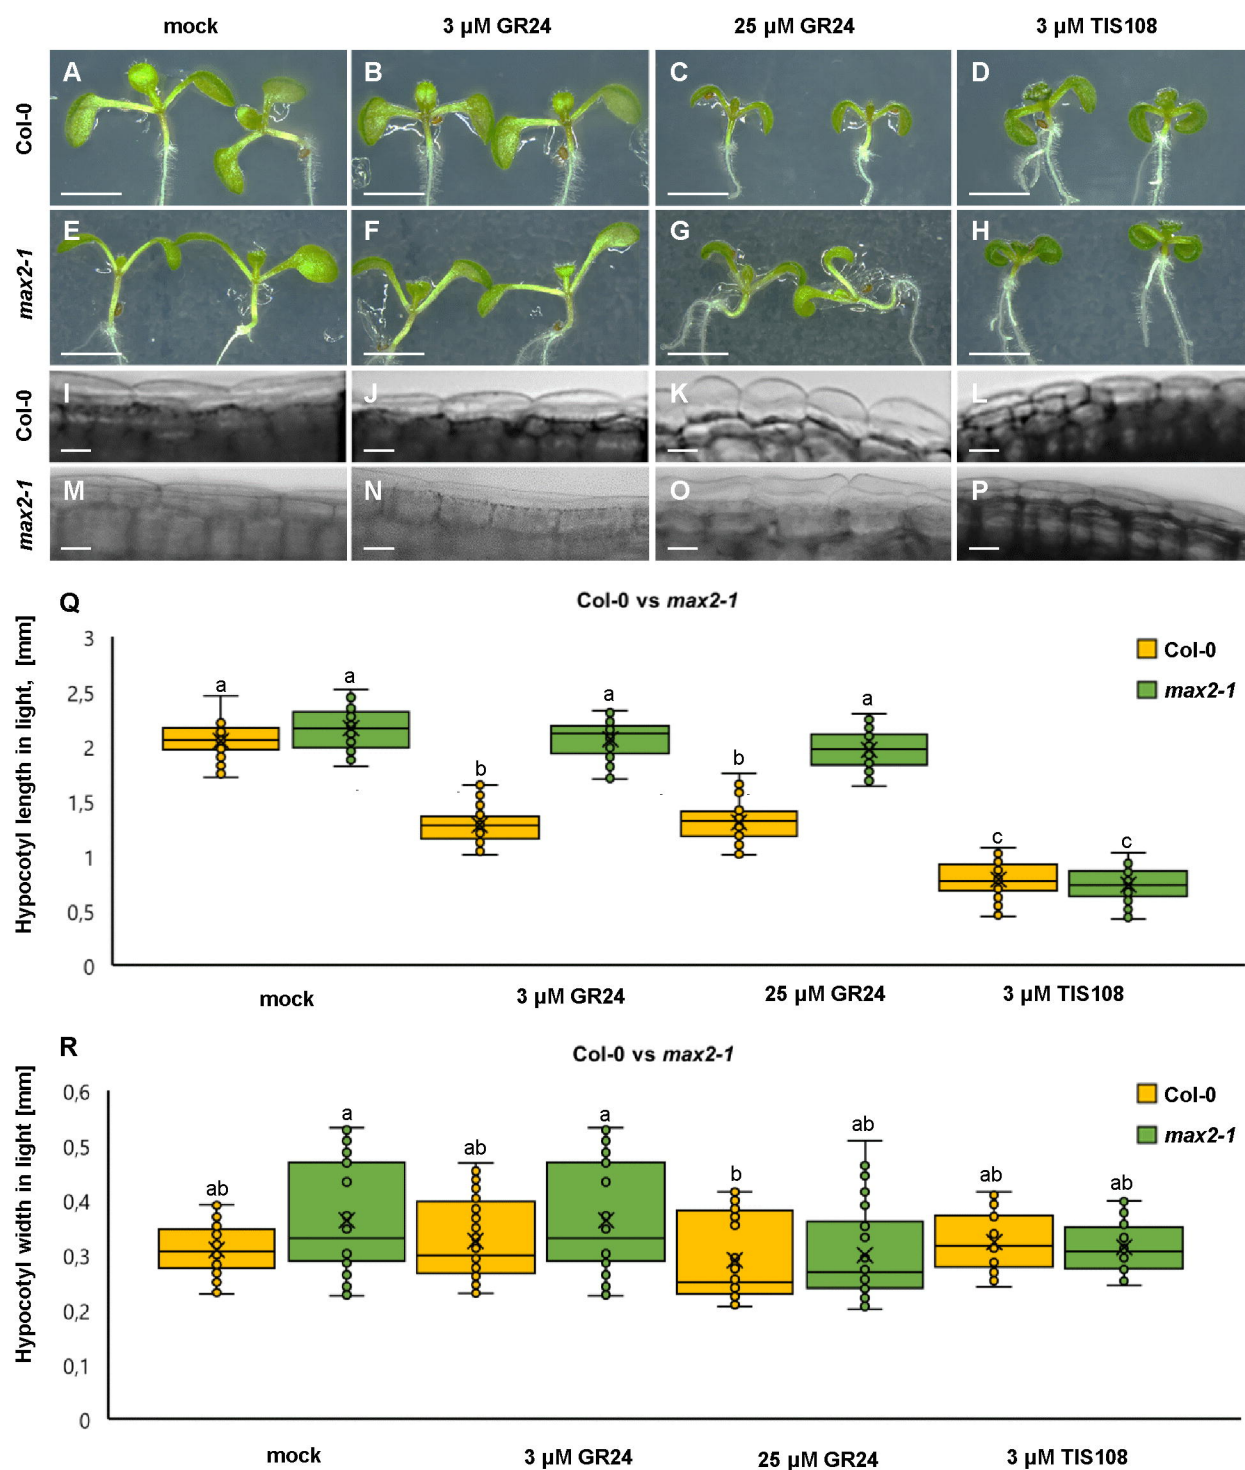



Figure 2

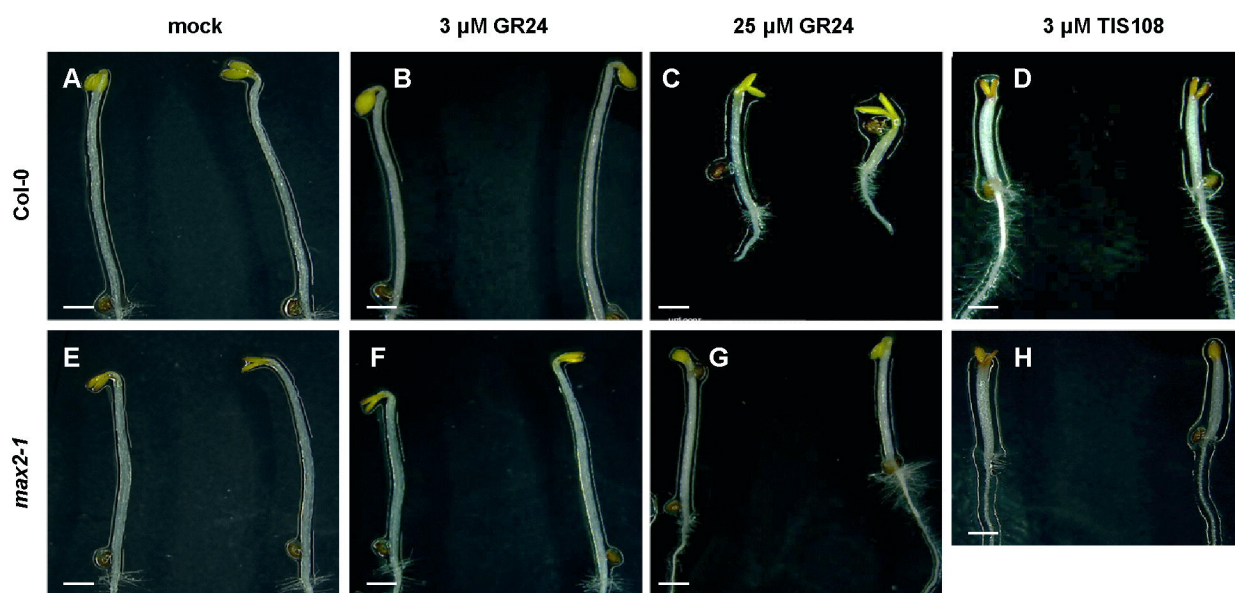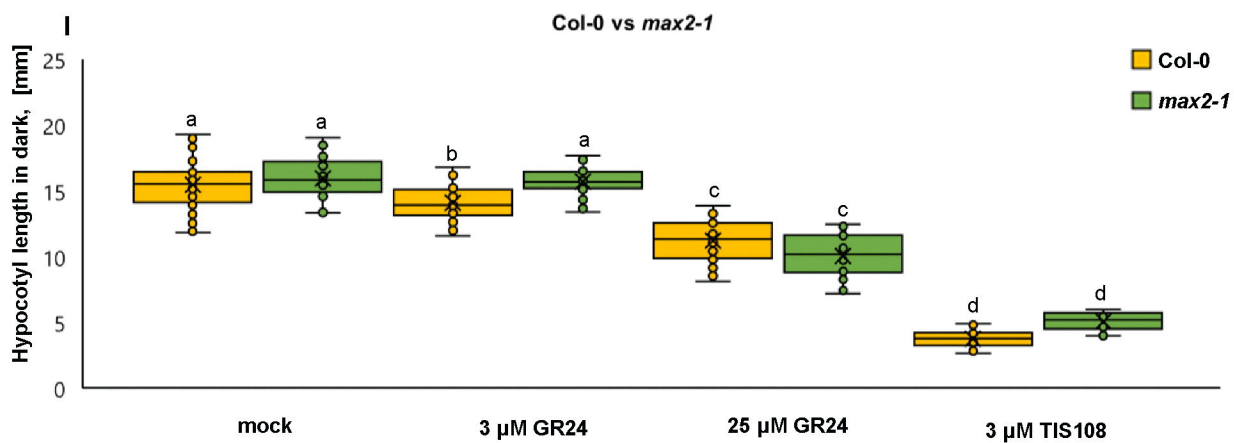

**Figure 3**

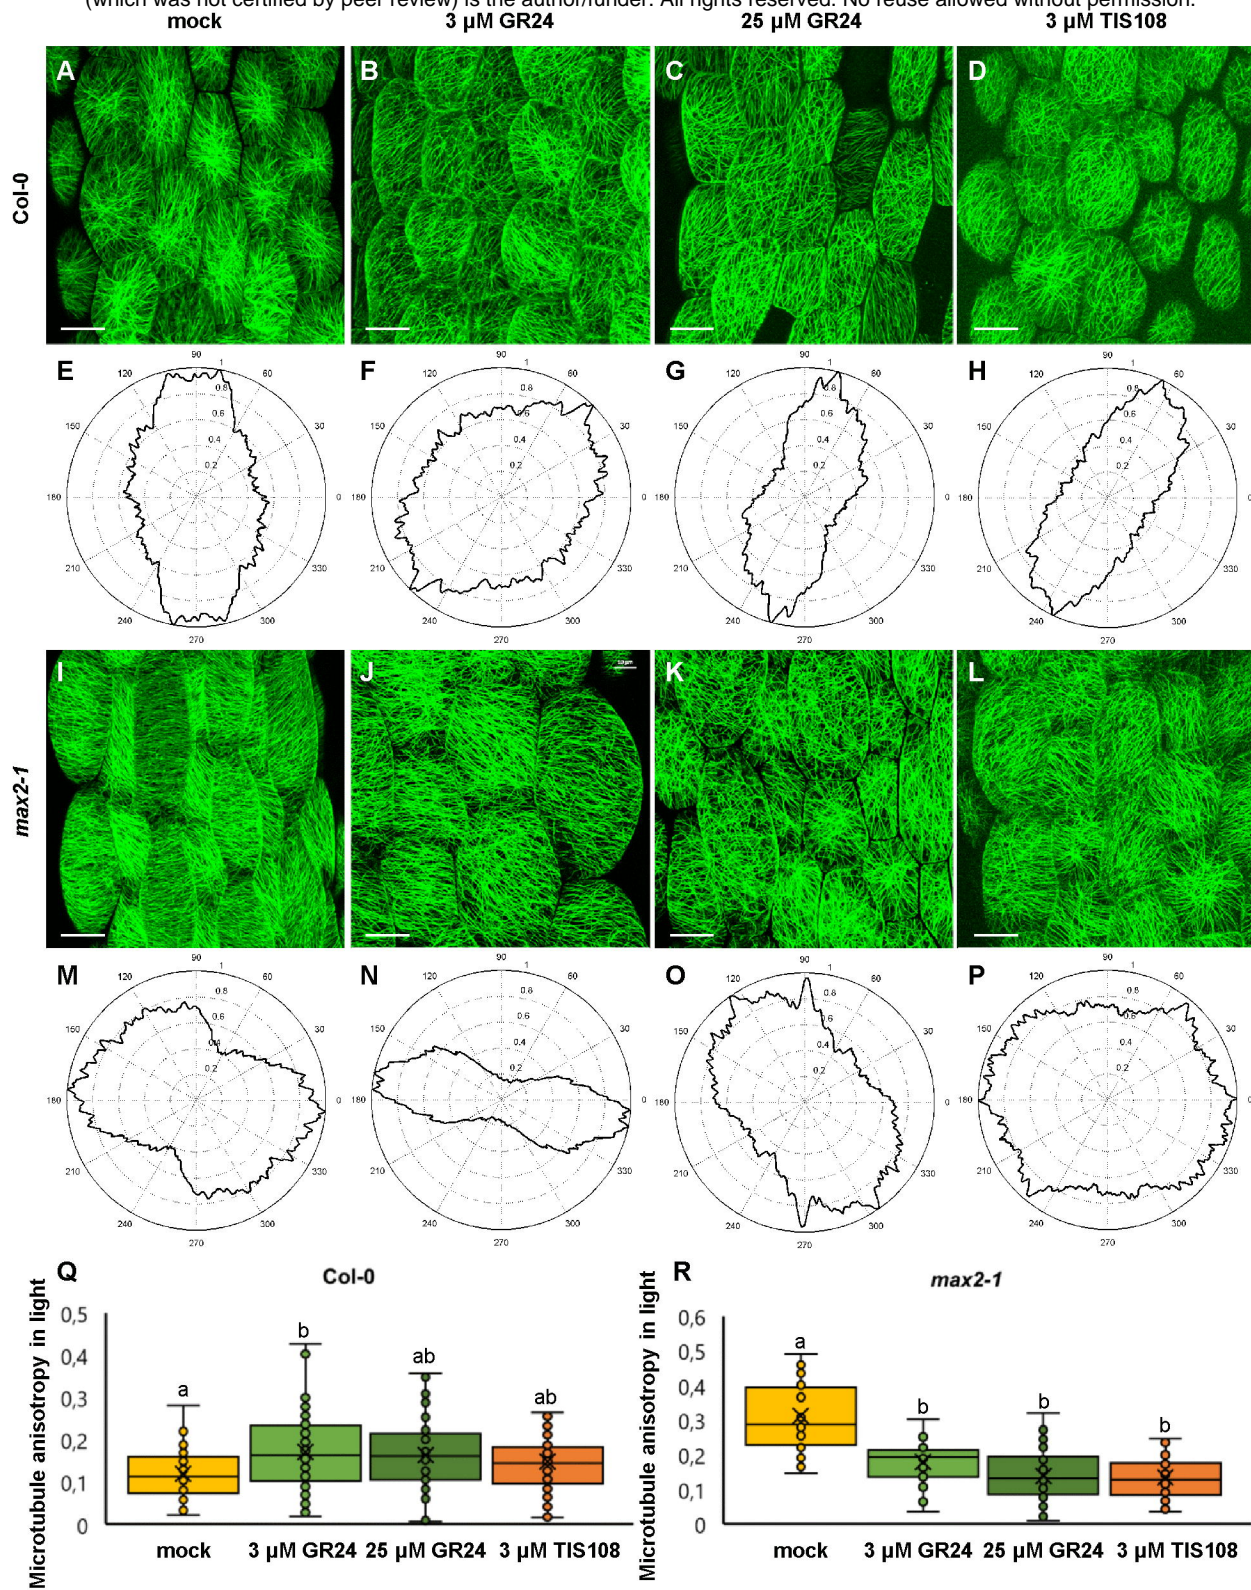

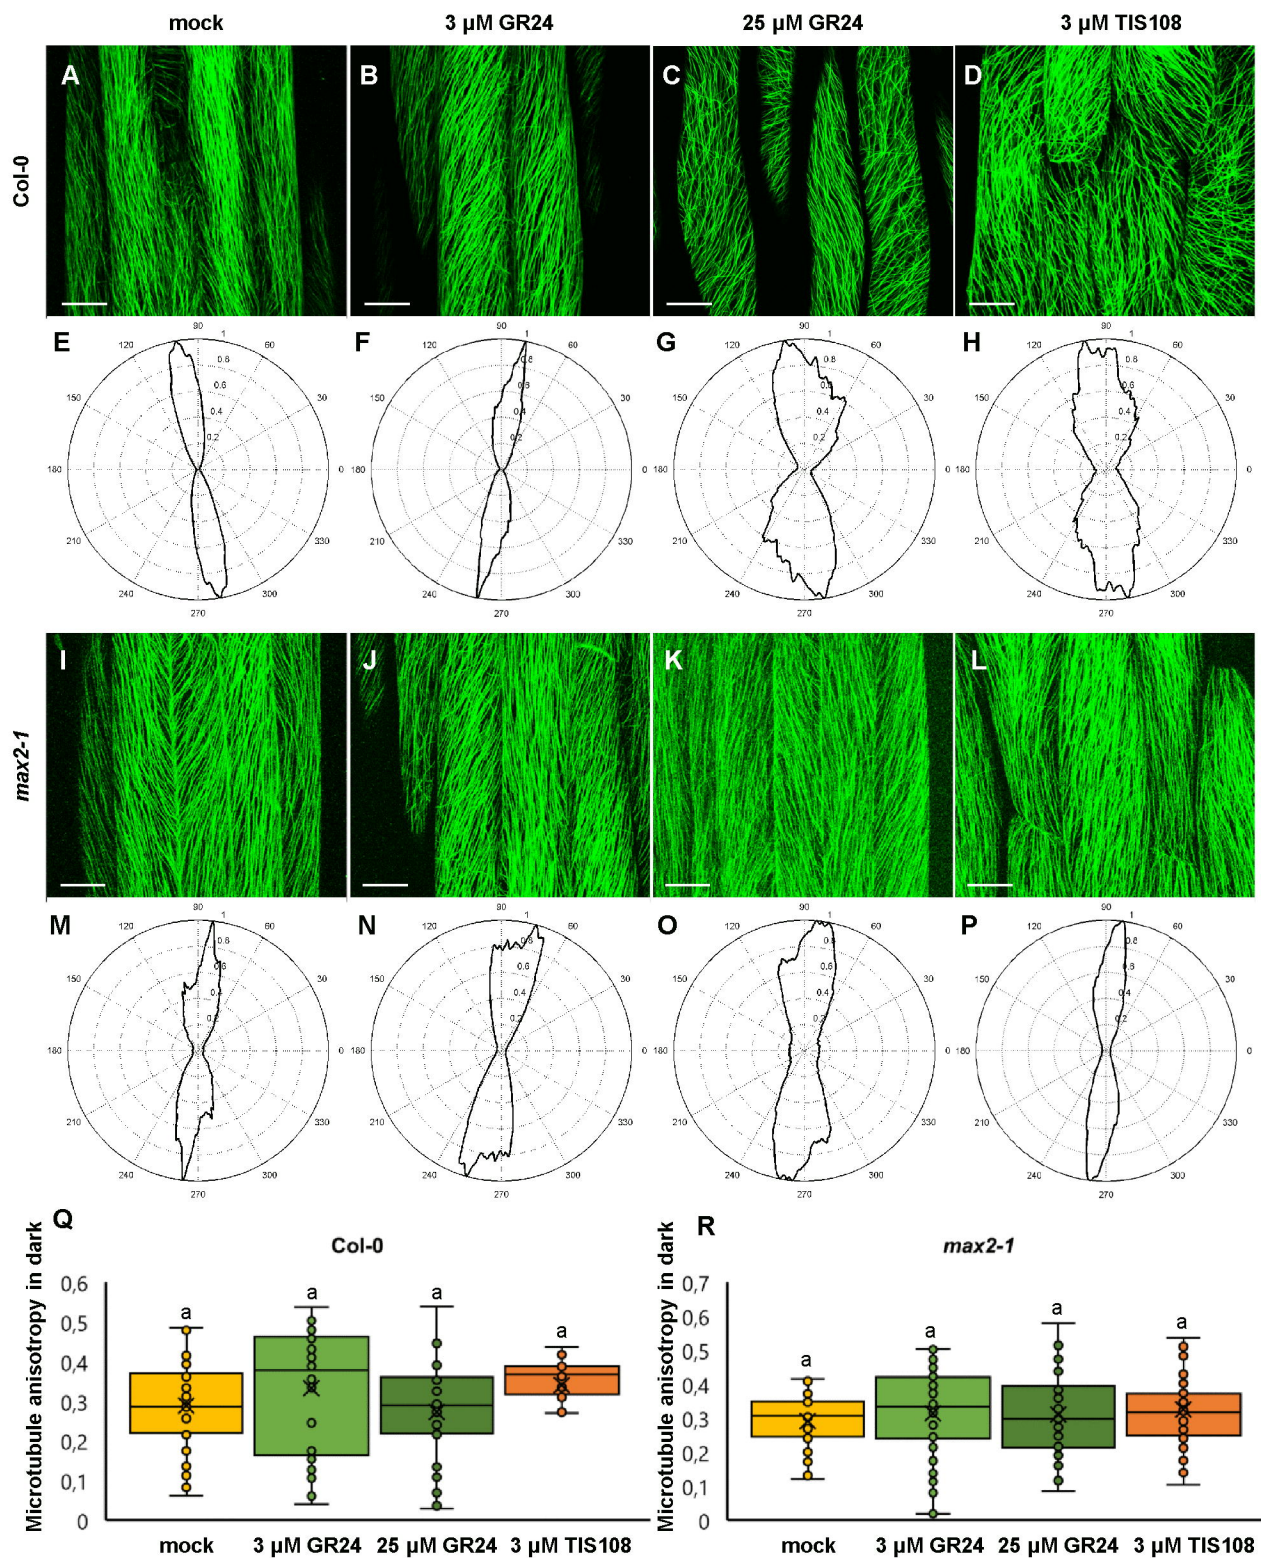

Figure 5

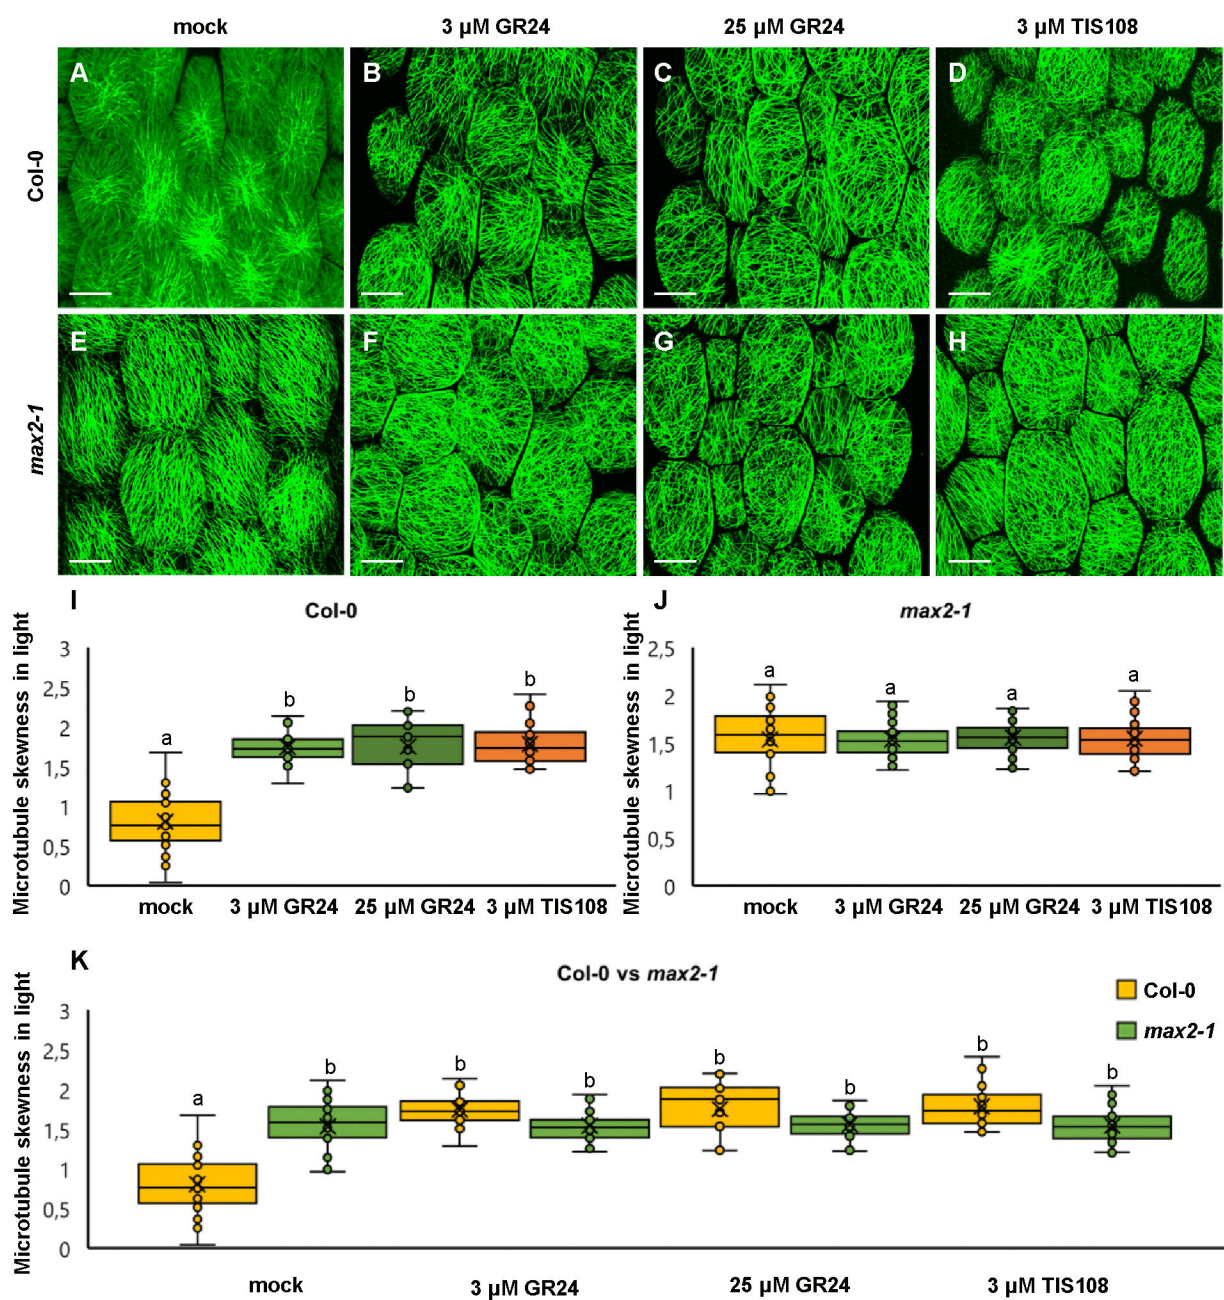

**Figure 6**

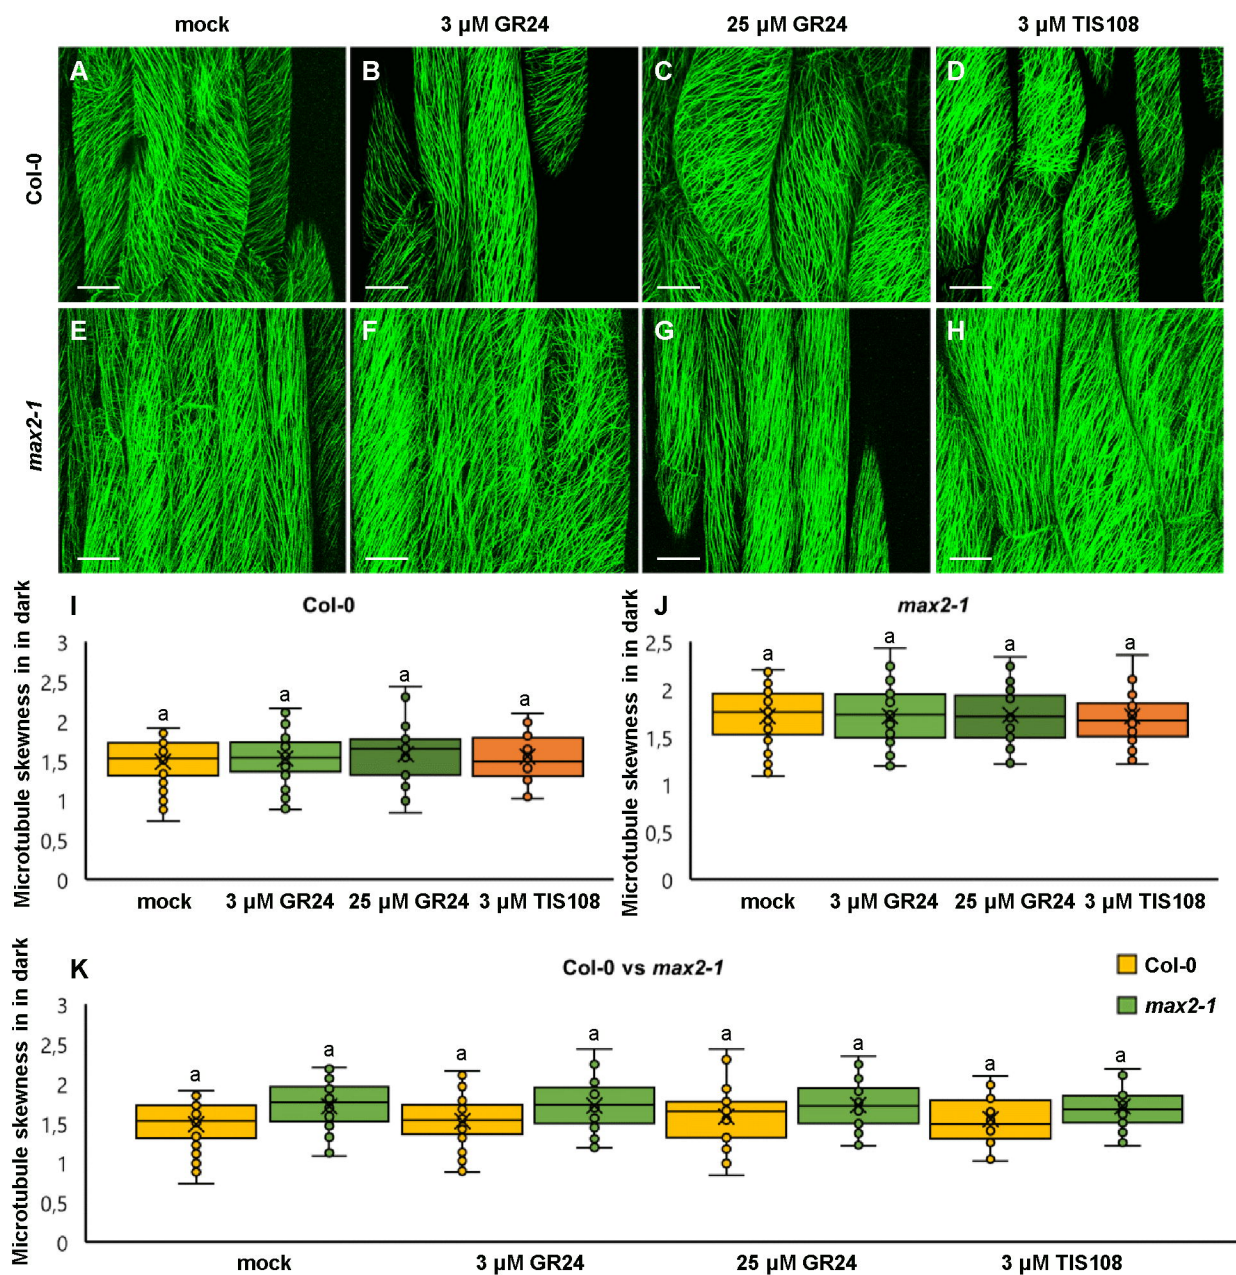

Figure 7

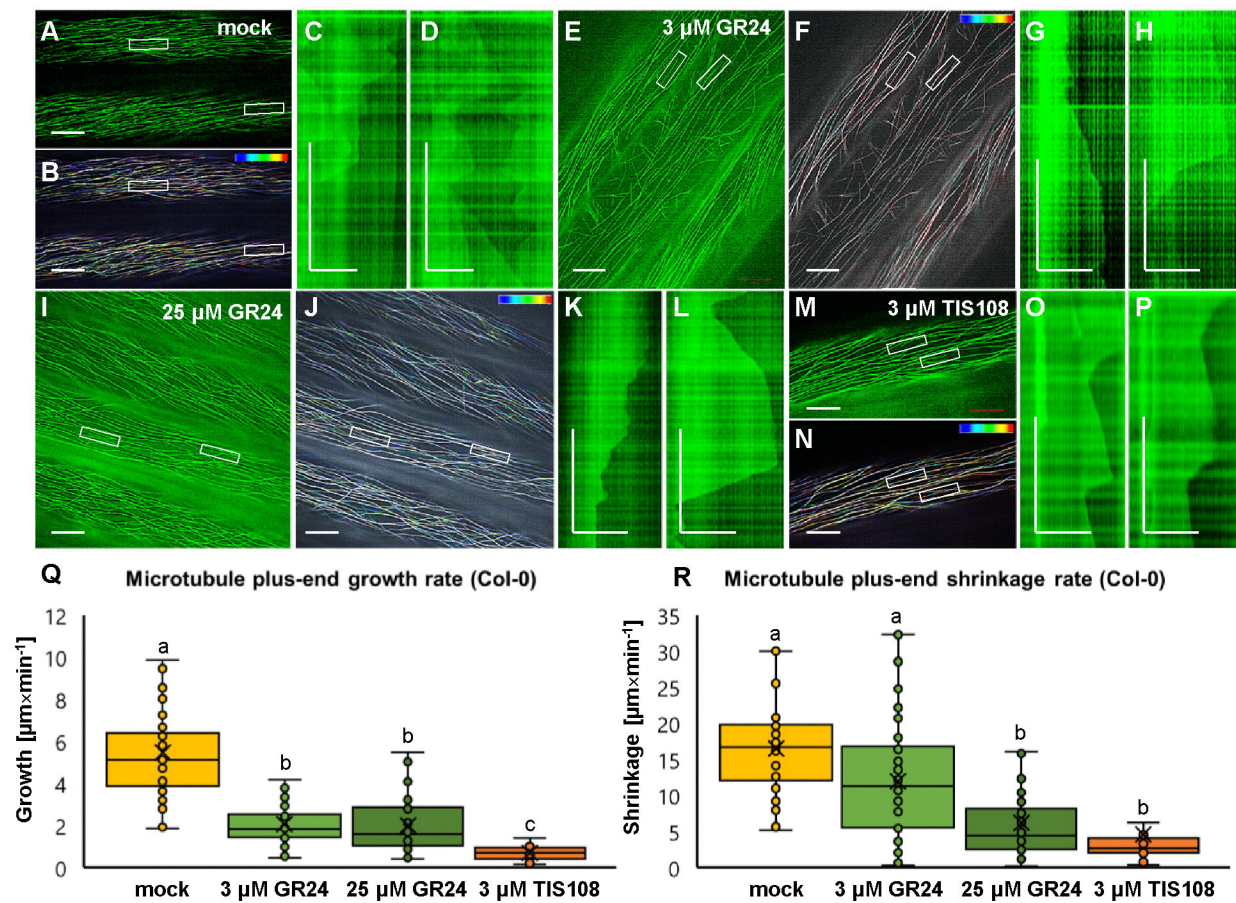

Figure 8

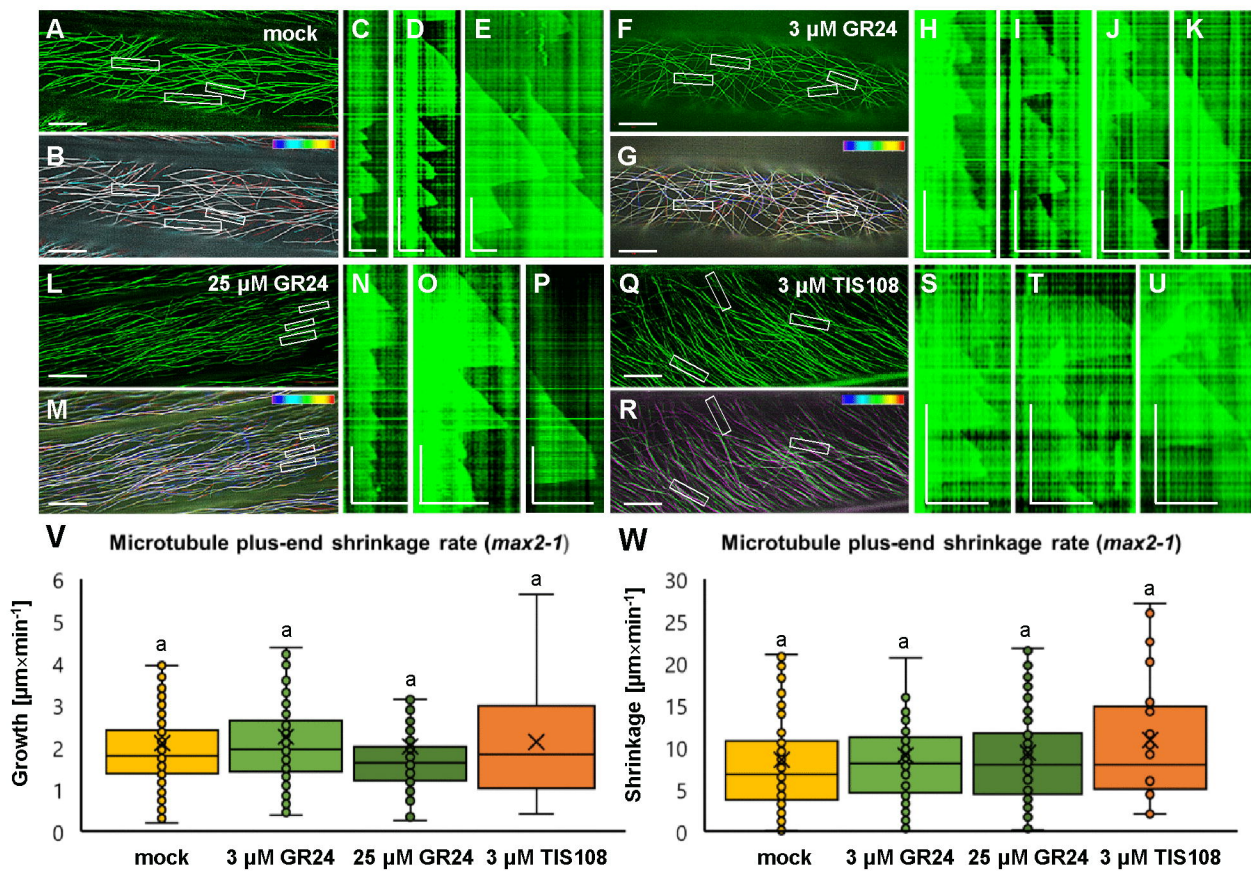

**Figure 9**

bioRxiv preprint doi: <https://doi.org/10.1101/2020.12.07.414524>; this version posted December 7, 2020. The copyright holder for this preprint (which was not certified by peer review) is the author/funder. All rights reserved. No reuse allowed without permission.

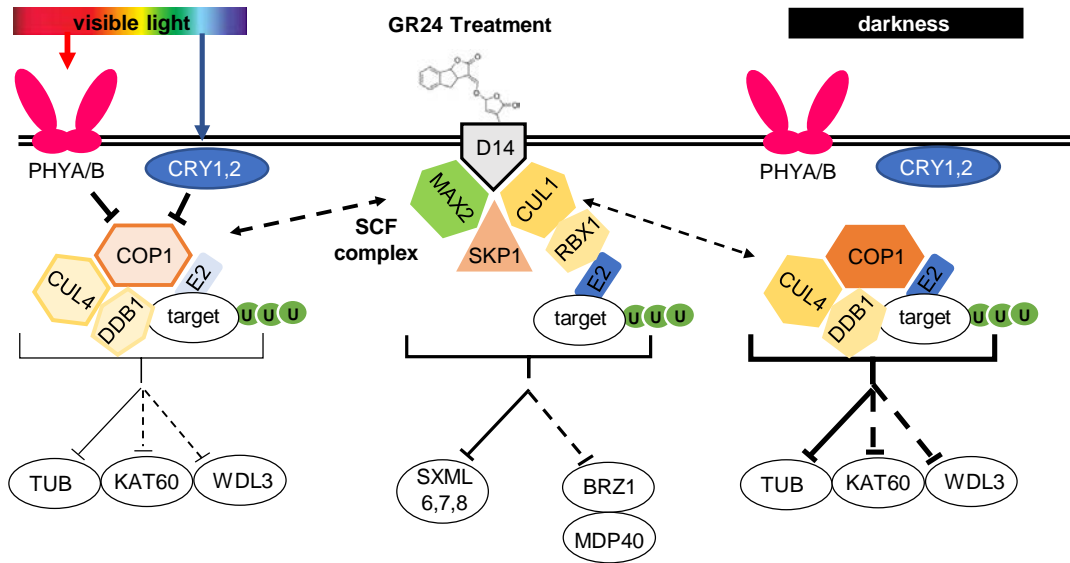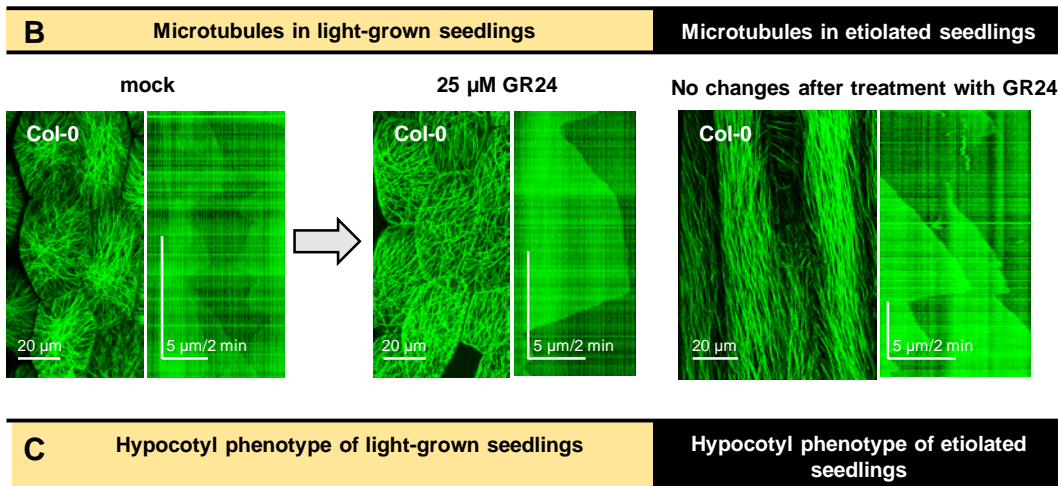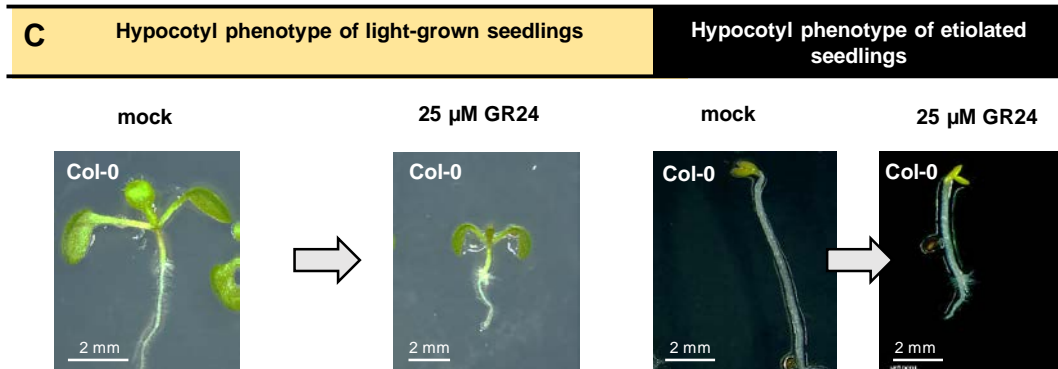

Source: https://www.biorxiv.org/content/10.1101/2020.12.07.414524v1.full.pdf
